# Supplementary material for: Hospital Admission Patterns in Adult Patients with Community-Acquired Pneumonia Who Received Ceftriaxone and a Macrolide by Disease Severity across United States Hospitals
Source: MDPI journal article supplement (doi:10.3390/antibiotics9090577), 2020-09-04
Supplement: s1 [file s1]

## Supplementary Data

**Table S1.** ICD-9-CM codes for CAP.

| ICD-9-CM | Code Description                                                      |
|----------|-----------------------------------------------------------------------|
| 481      | Pneumococcal pneumonia [ <i>Streptococcus pneumoniae</i> pneumonia]   |
| 4821     | Pneumonia due to <i>Pseudomonas</i>                                   |
| 4822     | Pneumonia due to <i>Haemophilus influenzae</i>                        |
| 48230    | Pneumonia due to <i>Streptococcus</i> , unspecified                   |
| 48231    | Pneumonia due to <i>Streptococcus</i> , group A                       |
| 48232    | Pneumonia due to <i>Streptococcus</i> , group B                       |
| 48239    | Pneumonia due to other <i>Streptococcus</i>                           |
| 48240    | Pneumonia due to <i>Staphylococcus</i> , unspecified                  |
| 48241    | Methicillin susceptible pneumonia due to <i>Staphylococcus aureus</i> |
| 48242    | Methicillin resistant pneumonia due to <i>Staphylococcus aureus</i>   |
| 48249    | Other <i>Staphylococcus</i> pneumonia                                 |
| 48281    | Pneumonia due to anaerobes                                            |
| 48282    | Pneumonia due to <i>Escherichia coli</i>                              |
| 48283    | Pneumonia due to other gram-negative bacteria                         |
| 48284    | Pneumonia due to Legionnaires' disease                                |
| 48289    | Pneumonia due to other specified bacteria                             |
| 4829     | Bacterial pneumonia, unspecified                                      |
| 4830     | Pneumonia due to <i>Mycoplasma pneumoniae</i>                         |
| 4831     | Pneumonia due to <i>Chlamydia</i>                                     |
| 4838     | Pneumonia due to other specified organism                             |
| 4845     | Pneumonia in anthrax                                                  |
| 485      | Bronchopneumonia, organism unspecified                                |
| 486      | Pneumonia, organism unspecified                                       |

Abbreviation: ICD-9-CM, International Classification of Diseases, 9th revision, Clinical Modification.

**Table S2. MedAssets PSI score criteria and adaptations.**

| <b>PSI Score Criteria</b>                        | <b>Formula to Calculate Score<br/>(present = 1; absent = 0)</b> | <b>Corresponding Conditions with<br/>Available ICD-9-CM Code</b> |
|--------------------------------------------------|-----------------------------------------------------------------|------------------------------------------------------------------|
| Age                                              | Age at index in years +                                         |                                                                  |
| Gender                                           | Female *(-10) +                                                 |                                                                  |
| Nursing home resident                            | Nursing home resident *10 +                                     | Excluded from the analysis                                       |
| Neoplastic disease                               | Neoplastic disease *30 +                                        | Neoplastic disease                                               |
| Liver disease history                            | Liver disease history *20 +                                     | Liver disease before or at index date                            |
| CHF history                                      | CHF history *10 +                                               | CHF before or at index date                                      |
| Cerebrovascular disease<br>history               | Cerebrovascular disease history<br>*10 +                        | Cerebrovascular disease before or at<br>index date               |
| Renal disease history                            | Renal disease history *10 +                                     | Renal disease before or at index date                            |
| Altered mental status                            | Altered mental status *20 +                                     | Altered mental status                                            |
| Respiratory rate >29<br>breaths/minute           | [Respiratory rate >29<br>breaths/minute] *20 +                  | Tachypnea                                                        |
| SBP <90 mm Hg                                    | [SBP <90 mm Hg] *20 +                                           | Hypotension                                                      |
| Temperature <35°C (95°F) or<br>>39.9°C (103.8°F) | [Temperature <35°C (95°F) or<br>>39.9°C (103.8°F)] *15 +        | Hypothermia, malignant<br>hyperthermia                           |
| Pulse >124 beats/minute                          | [Pulse >124] *10 +                                              | Tachycardia                                                      |
| pH <7.35                                         | [pH <7.35] *30 +                                                | Acidosis                                                         |
| BUN >29 mg/dL                                    | [BUN >29] *20 +                                                 | Non-specific abnormal results of<br>function study of kidney     |
| Sodium < 130 mg/dL                               | [Sodium <130] *20 +                                             | Hypoosmolality and/or<br>hyponatremia                            |
| Glucose > 249 mg/dL (US) or<br>13.8 mmol/L (SI)  | [Glucose >249 (US) or 13.8 (SI)]<br>*10 +                       | Abnormal glucose                                                 |
| Hct 30%                                          | [Hct <30%] *10 +                                                | Precipitous drop in Hct                                          |
| Partial pressure of oxygen <60<br>mm Hg          | [Partial pressure of oxygen <60<br>mm Hg] *10 +                 | Hypoxemia                                                        |
| Pleural effusion on X-ray                        | [Pleural effusion on X-ray] *10 +                               | Pleural effusion                                                 |

BUN, blood urea nitrogen; CHF, congestive heart failure; Hct, hematocrit; PSI, Pneumonia Severity Index; ICD-9-CM, International Classification of Diseases, 9th revision, clinical modification (ICD-9-CM); SBP, systolic blood pressure.

**Table S3.** ICD-9-CM codes for PSI score criteria and adaptations.

| PSI Score Criteria | ICD-9-CM | Description                                                          |
|--------------------|----------|----------------------------------------------------------------------|
| Neoplastic disease | 140      | Malignant neoplasm of lip                                            |
| Neoplastic disease | 1400     | Malignant neoplasm of upper lip vermillion border                    |
| Neoplastic disease | 1401     | Malignant neoplasm of lower lip vermillion border                    |
| Neoplastic disease | 1403     | Malignant neoplasm of upper lip inner aspect                         |
| Neoplastic disease | 1404     | Malignant neoplasm of lower lip inner aspect                         |
| Neoplastic disease | 1405     | Malignant neoplasm of lip unspecified inner aspect                   |
| Neoplastic disease | 1406     | Malignant neoplasm of commissure of lip                              |
| Neoplastic disease | 1408     | Malignant neoplasm of other sites of lip                             |
| Neoplastic disease | 1409     | Malignant neoplasm of lip unspecified vermillion border              |
| Neoplastic disease | 141      | Malignant neoplasm of tongue                                         |
| Neoplastic disease | 1410     | Malignant neoplasm of base of tongue                                 |
| Neoplastic disease | 1411     | Malignant neoplasm of dorsal surface of tongue                       |
| Neoplastic disease | 1412     | Malignant neoplasm of tip and lateral border of tongue               |
| Neoplastic disease | 1413     | Malignant neoplasm of ventral surface of tongue                      |
| Neoplastic disease | 1414     | Malignant neoplasm of anterior two-thirds of tongue part unspecified |
| Neoplastic disease | 1415     | Malignant neoplasm of junctional zone of tongue                      |
| Neoplastic disease | 1416     | Malignant neoplasm of lingual tonsil                                 |
| Neoplastic disease | 1418     | Malignant neoplasm of other sites of tongue                          |
| Neoplastic disease | 1419     | Malignant neoplasm of tongue unspecified                             |
| Neoplastic disease | 142      | Malignant neoplasm of major salivary glands                          |
| Neoplastic disease | 1420     | Malignant neoplasm of parotid gland                                  |
| Neoplastic disease | 1421     | Malignant neoplasm of submandibular gland                            |
| Neoplastic disease | 1422     | Malignant neoplasm of sublingual gland                               |
| Neoplastic disease | 1428     | Malignant neoplasm of other major salivary glands                    |
| Neoplastic disease | 1429     | Malignant neoplasm of salivary gland unspecified                     |
| Neoplastic disease | 143      | Malignant neoplasm of gum                                            |
| Neoplastic disease | 1430     | Malignant neoplasm of upper gum                                      |
| Neoplastic disease | 1431     | Malignant neoplasm of lower gum                                      |
| Neoplastic disease | 1438     | Malignant neoplasm of other sites of gum                             |
| Neoplastic disease | 1439     | Malignant neoplasm of gum unspecified                                |
| Neoplastic disease | 144      | Malignant neoplasm of floor of mouth                                 |
| Neoplastic disease | 1440     | Malignant neoplasm of anterior portion of floor of mouth             |
| Neoplastic disease | 1441     | Malignant neoplasm of lateral portion of floor of mouth              |
| Neoplastic disease | 1448     | Malignant neoplasm of other sites of floor of mouth                  |
| Neoplastic disease | 1449     | Malignant neoplasm of floor of mouth part unspecified                |
| Neoplastic disease | 145      | Malignant neoplasm of other and unspecified parts of mouth           |
| Neoplastic disease | 1450     | Malignant neoplasm of cheek mucosa                                   |
| Neoplastic disease | 1451     | Malignant neoplasm of vestibule of mouth                             |
| Neoplastic disease | 1452     | Malignant neoplasm of hard palate                                    |
| Neoplastic disease | 1453     | Malignant neoplasm of soft palate                                    |
| Neoplastic disease | 1454     | Malignant neoplasm of uvula                                          |
| Neoplastic disease | 1455     | Malignant neoplasm of palate unspecified                             |
| Neoplastic disease | 1456     | Malignant neoplasm of retromolar area                                |
| Neoplastic disease | 1458     | Malignant neoplasm of other specified parts of mouth                 |
| Neoplastic disease | 1459     | Malignant neoplasm of mouth unspecified                              |
| Neoplastic disease | 146      | Malignant neoplasm of oropharynx                                     |
| Neoplastic disease | 1460     | Malignant neoplasm of tonsil                                         |
| Neoplastic disease | 1461     | Malignant neoplasm of tonsillar fossa                                |
| Neoplastic disease | 1462     | Malignant neoplasm of tonsillar pillars (anterior, posterior)        |
| Neoplastic disease | 1463     | Malignant neoplasm of vallecula epiglottica                          |
| Neoplastic disease | 1464     | Malignant neoplasm of anterior aspect of epiglottis                  |
| Neoplastic disease | 1465     | Malignant neoplasm of junctional region of oropharynx                |

|                    |      |                                                                                          |
|--------------------|------|------------------------------------------------------------------------------------------|
| Neoplastic disease | 1466 | Malignant neoplasm of lateral wall of oropharynx                                         |
| Neoplastic disease | 1467 | Malignant neoplasm of posterior wall of oropharynx                                       |
| Neoplastic disease | 1468 | Malignant neoplasm of other specified sites of oropharynx                                |
| Neoplastic disease | 1469 | Malignant neoplasm of oropharynx unspecified site                                        |
| Neoplastic disease | 147  | Malignant neoplasm of nasopharynx                                                        |
| Neoplastic disease | 1470 | Malignant neoplasm of superior wall of nasopharynx                                       |
| Neoplastic disease | 1471 | Malignant neoplasm of posterior wall of nasopharynx                                      |
| Neoplastic disease | 1472 | Malignant neoplasm of lateral wall of nasopharynx                                        |
| Neoplastic disease | 1473 | Malignant neoplasm of anterior wall of nasopharynx                                       |
| Neoplastic disease | 1478 | Malignant neoplasm of other specified sites of nasopharynx                               |
| Neoplastic disease | 1479 | Malignant neoplasm of nasopharynx unspecified site                                       |
| Neoplastic disease | 148  | Malignant neoplasm of hypopharynx                                                        |
| Neoplastic disease | 1480 | Malignant neoplasm of postcricoid region of hypopharynx                                  |
| Neoplastic disease | 1481 | Malignant neoplasm of pyriform sinus                                                     |
| Neoplastic disease | 1482 | Malignant neoplasm of aryepiglottic fold hypopharyngeal aspect                           |
| Neoplastic disease | 1483 | Malignant neoplasm of posterior hypopharyngeal wall                                      |
| Neoplastic disease | 1488 | Malignant neoplasm of other specified sites of hypopharynx                               |
| Neoplastic disease | 1489 | Malignant neoplasm of hypopharynx unspecified site                                       |
| Neoplastic disease | 149  | Malignant neoplasm of other and ill-defined sites within the lip oral cavity and pharynx |
| Neoplastic disease | 1490 | Malignant neoplasm of pharynx unspecified                                                |
| Neoplastic disease | 1491 | Malignant neoplasm of Waldeyer's ring                                                    |
| Neoplastic disease | 1498 | Malignant neoplasm of other sites within the lip and oral cavity                         |
| Neoplastic disease | 1499 | Malignant neoplasm of ill-defined sites within the lip and oral cavity                   |
| Neoplastic disease | 150  | Malignant neoplasm of esophagus                                                          |
| Neoplastic disease | 1500 | Malignant neoplasm of cervical esophagus                                                 |
| Neoplastic disease | 1501 | Malignant neoplasm of thoracic esophagus                                                 |
| Neoplastic disease | 1502 | Malignant neoplasm of abdominal esophagus                                                |
| Neoplastic disease | 1503 | Malignant neoplasm of upper third of esophagus                                           |
| Neoplastic disease | 1504 | Malignant neoplasm of middle third of esophagus                                          |
| Neoplastic disease | 1505 | Malignant neoplasm of lower third of esophagus                                           |
| Neoplastic disease | 1508 | Malignant neoplasm of other specified part of esophagus                                  |
| Neoplastic disease | 1509 | Malignant neoplasm of esophagus unspecified site                                         |
| Neoplastic disease | 151  | Malignant neoplasm of stomach                                                            |
| Neoplastic disease | 1510 | Malignant neoplasm of cardia                                                             |
| Neoplastic disease | 1511 | Malignant neoplasm of pylorus                                                            |
| Neoplastic disease | 1512 | Malignant neoplasm of pyloric antrum                                                     |
| Neoplastic disease | 1513 | Malignant neoplasm of fundus of stomach                                                  |
| Neoplastic disease | 1514 | Malignant neoplasm of body of stomach                                                    |
| Neoplastic disease | 1515 | Malignant neoplasm of lesser curvature of stomach unspecified                            |
| Neoplastic disease | 1516 | Malignant neoplasm of greater curvature of stomach unspecified                           |
| Neoplastic disease | 1518 | Malignant neoplasm of other specified sites of stomach                                   |
| Neoplastic disease | 1519 | Malignant neoplasm of stomach unspecified site                                           |
| Neoplastic disease | 152  | Malignant neoplasm of small intestine including duodenum                                 |
| Neoplastic disease | 1520 | Malignant neoplasm of duodenum                                                           |
| Neoplastic disease | 1521 | Malignant neoplasm of jejunum                                                            |
| Neoplastic disease | 1522 | Malignant neoplasm of ileum                                                              |
| Neoplastic disease | 1523 | Malignant neoplasm of Meckel's diverticulum                                              |
| Neoplastic disease | 1528 | Malignant neoplasm of other specified sites of small intestine                           |
| Neoplastic disease | 1529 | Malignant neoplasm of small intestine unspecified site                                   |
| Neoplastic disease | 153  | Malignant neoplasm of colon                                                              |
| Neoplastic disease | 1530 | Malignant neoplasm of hepatic flexure                                                    |
| Neoplastic disease | 1531 | Malignant neoplasm of transverse colon                                                   |
| Neoplastic disease | 1532 | Malignant neoplasm of descending colon                                                   |
| Neoplastic disease | 1533 | Malignant neoplasm of sigmoid colon                                                      |
| Neoplastic disease | 1534 | Malignant neoplasm of cecum                                                              |

|                    |      |                                                                                              |
|--------------------|------|----------------------------------------------------------------------------------------------|
| Neoplastic disease | 1535 | Malignant neoplasm of appendix vermiformis                                                   |
| Neoplastic disease | 1536 | Malignant neoplasm of ascending colon                                                        |
| Neoplastic disease | 1537 | Malignant neoplasm of splenic flexure                                                        |
| Neoplastic disease | 1538 | Malignant neoplasm of other specified sites of large intestine                               |
| Neoplastic disease | 1539 | Malignant neoplasm of colon unspecified site                                                 |
| Neoplastic disease | 154  | Malignant neoplasm of rectum rectosigmoid junction and anus                                  |
| Neoplastic disease | 1540 | Malignant neoplasm of rectosigmoid junction                                                  |
| Neoplastic disease | 1541 | Malignant neoplasm of rectum                                                                 |
| Neoplastic disease | 1542 | Malignant neoplasm of anal canal                                                             |
| Neoplastic disease | 1543 | Malignant neoplasm of anus unspecified site                                                  |
| Neoplastic disease | 1548 | Malignant neoplasm of other sites of rectum rectosigmoid junction and anus                   |
| Neoplastic disease | 155  | Malignant neoplasm of liver and intrahepatic bile ducts                                      |
| Neoplastic disease | 1550 | Malignant neoplasm of liver primary                                                          |
| Neoplastic disease | 1551 | Malignant neoplasm of intrahepatic bile ducts                                                |
| Neoplastic disease | 1552 | Malignant neoplasm of liver not specified as primary or secondary                            |
| Neoplastic disease | 156  | Malignant neoplasm of gallbladder and extrahepatic bile ducts                                |
| Neoplastic disease | 1560 | Malignant neoplasm of gallbladder                                                            |
| Neoplastic disease | 1561 | Malignant neoplasm of extrahepatic bile ducts                                                |
| Neoplastic disease | 1562 | Malignant neoplasm of ampulla of Vater                                                       |
| Neoplastic disease | 1568 | Malignant neoplasm of other specified sites of gallbladder and extrahepatic bile ducts       |
| Neoplastic disease | 1569 | Malignant neoplasm of biliary tract part unspecified site                                    |
| Neoplastic disease | 157  | Malignant neoplasm of pancreas                                                               |
| Neoplastic disease | 1570 | Malignant neoplasm of head of pancreas                                                       |
| Neoplastic disease | 1571 | Malignant neoplasm of body of pancreas                                                       |
| Neoplastic disease | 1572 | Malignant neoplasm of tail of pancreas                                                       |
| Neoplastic disease | 1573 | Malignant neoplasm of pancreatic duct                                                        |
| Neoplastic disease | 1574 | Malignant neoplasm of islets of Langerhans                                                   |
| Neoplastic disease | 1578 | Malignant neoplasm of other specified sites of pancreas                                      |
| Neoplastic disease | 1579 | Malignant neoplasm of pancreas part unspecified                                              |
| Neoplastic disease | 158  | Malignant neoplasm of retroperitoneum and peritoneum                                         |
| Neoplastic disease | 1580 | Malignant neoplasm of retroperitoneum                                                        |
| Neoplastic disease | 1588 | Malignant neoplasm of specified parts of peritoneum                                          |
| Neoplastic disease | 1589 | Malignant neoplasm of peritoneum unspecified                                                 |
| Neoplastic disease | 159  | Malignant neoplasm of other and ill-defined sites within the digestive organs and peritoneum |
| Neoplastic disease | 1590 | Malignant neoplasm of intestinal tract part unspecified                                      |
| Neoplastic disease | 1591 | Malignant neoplasm of spleen not elsewhere classified                                        |
| Neoplastic disease | 1598 | Malignant neoplasm of other sites of digestive system and intra-abdominal organs             |
| Neoplastic disease | 1599 | Malignant neoplasm of ill-defined sites within the digestive organs and peritoneum           |
| Neoplastic disease | 160  | Malignant neoplasm of nasal cavities middle ear and accessory sinuses                        |
| Neoplastic disease | 1600 | Malignant neoplasm of nasal cavities                                                         |
| Neoplastic disease | 1601 | Malignant neoplasm of auditory tube middle ear and mastoid air cells                         |
| Neoplastic disease | 1602 | Malignant neoplasm of maxillary sinus                                                        |
| Neoplastic disease | 1603 | Malignant neoplasm of ethmoidal sinus                                                        |
| Neoplastic disease | 1604 | Malignant neoplasm of frontal sinus                                                          |
| Neoplastic disease | 1605 | Malignant neoplasm of sphenoidal sinus                                                       |
| Neoplastic disease | 1608 | Malignant neoplasm of other accessory sinuses                                                |
| Neoplastic disease | 1609 | Malignant neoplasm of accessory sinus unspecified                                            |
| Neoplastic disease | 161  | Malignant neoplasm of larynx                                                                 |
| Neoplastic disease | 1610 | Malignant neoplasm of glottis                                                                |
| Neoplastic disease | 1611 | Malignant neoplasm of supraglottis                                                           |
| Neoplastic disease | 1612 | Malignant neoplasm of subglottis                                                             |

|                    |      |                                                                                                          |
|--------------------|------|----------------------------------------------------------------------------------------------------------|
| Neoplastic disease | 1613 | Malignant neoplasm of laryngeal cartilages                                                               |
| Neoplastic disease | 1618 | Malignant neoplasm of other specified sites of larynx                                                    |
| Neoplastic disease | 1619 | Malignant neoplasm of larynx unspecified                                                                 |
| Neoplastic disease | 162  | Malignant neoplasm of trachea bronchus and lung                                                          |
| Neoplastic disease | 1620 | Malignant neoplasm of trachea                                                                            |
| Neoplastic disease | 1622 | Malignant neoplasm of main bronchus                                                                      |
| Neoplastic disease | 1623 | Malignant neoplasm of upper lobe bronchus or lung                                                        |
| Neoplastic disease | 1624 | Malignant neoplasm of middle lobe bronchus or lung                                                       |
| Neoplastic disease | 1625 | Malignant neoplasm of lower lobe bronchus or lung                                                        |
| Neoplastic disease | 1628 | Malignant neoplasm of other parts of bronchus or lung                                                    |
| Neoplastic disease | 1629 | Malignant neoplasm of bronchus and lung unspecified                                                      |
| Neoplastic disease | 163  | Malignant neoplasm of pleura                                                                             |
| Neoplastic disease | 1630 | Malignant neoplasm of parietal pleura                                                                    |
| Neoplastic disease | 1631 | Malignant neoplasm of visceral pleura                                                                    |
| Neoplastic disease | 1638 | Malignant neoplasm of other specified sites of pleura                                                    |
| Neoplastic disease | 1639 | Malignant neoplasm of pleura unspecified                                                                 |
| Neoplastic disease | 164  | Malignant neoplasm of thymus heart and mediastinum                                                       |
| Neoplastic disease | 1640 | Malignant neoplasm of thymus                                                                             |
| Neoplastic disease | 1641 | Malignant neoplasm of heart                                                                              |
| Neoplastic disease | 1642 | Malignant neoplasm of anterior mediastinum                                                               |
| Neoplastic disease | 1643 | Malignant neoplasm of posterior mediastinum                                                              |
| Neoplastic disease | 1648 | Malignant neoplasm of other parts of mediastinum                                                         |
| Neoplastic disease | 1649 | Malignant neoplasm of mediastinum part unspecified                                                       |
| Neoplastic disease | 165  | Malignant neoplasm of other and ill-defined sites within the respiratory system and intrathoracic organs |
| Neoplastic disease | 1650 | Malignant neoplasm of upper respiratory tract part unspecified                                           |
| Neoplastic disease | 1658 | Malignant neoplasm of other sites within the respiratory system and intrathoracic organs                 |
| Neoplastic disease | 1659 | Malignant neoplasm of ill-defined sites within the respiratory system                                    |
| Neoplastic disease | 170  | Malignant neoplasm of bone and articular cartilage                                                       |
| Neoplastic disease | 1700 | Malignant neoplasm of bones of skull and face except mandible                                            |
| Neoplastic disease | 1701 | Malignant neoplasm of mandible                                                                           |
| Neoplastic disease | 1702 | Malignant neoplasm of vertebral column excluding sacrum and coccyx                                       |
| Neoplastic disease | 1703 | Malignant neoplasm of ribs sternum and clavicle                                                          |
| Neoplastic disease | 1704 | Malignant neoplasm of scapula and long bones of upper limb                                               |
| Neoplastic disease | 1705 | Malignant neoplasm of short bones of upper limb                                                          |
| Neoplastic disease | 1706 | Malignant neoplasm of pelvic bones sacrum and coccyx                                                     |
| Neoplastic disease | 1707 | Malignant neoplasm of long bones of lower limb                                                           |
| Neoplastic disease | 1708 | Malignant neoplasm of short bones of lower limb                                                          |
| Neoplastic disease | 1709 | Malignant neoplasm of bone and articular cartilage site unspecified                                      |
| Neoplastic disease | 171  | Malignant neoplasm of connective and other soft tissue                                                   |
| Neoplastic disease | 1710 | Malignant neoplasm of connective and other soft tissue of head face and neck                             |
| Neoplastic disease | 1712 | Malignant neoplasm of connective and other soft tissue of upper limb including shoulder                  |
| Neoplastic disease | 1713 | Malignant neoplasm of connective and other soft tissue of lower limb including hip                       |
| Neoplastic disease | 1714 | Malignant neoplasm of connective and other soft tissue of thorax                                         |
| Neoplastic disease | 1715 | Malignant neoplasm of connective and other soft tissue of abdomen                                        |
| Neoplastic disease | 1716 | Malignant neoplasm of connective and other soft tissue of pelvis                                         |
| Neoplastic disease | 1717 | Malignant neoplasm of connective and other soft tissue of trunk unspecified                              |
| Neoplastic disease | 1718 | Malignant neoplasm of other specified sites of connective and other soft tissue                          |
| Neoplastic disease | 1719 | Malignant neoplasm of connective and other soft tissue site unspecified                                  |
| Neoplastic disease | 172  | Malignant melanoma of skin                                                                               |

|                    |           |                                                                                         |
|--------------------|-----------|-----------------------------------------------------------------------------------------|
| Neoplastic disease | 1720      | Malignant melanoma of skin of lip                                                       |
| Neoplastic disease | 1721      | Malignant melanoma of skin of eyelid including canthus                                  |
| Neoplastic disease | 1722      | Malignant melanoma of skin of ear and external auditory canal                           |
| Neoplastic disease | 1723      | Malignant melanoma of skin of other and unspecified parts of face                       |
| Neoplastic disease | 1724      | Malignant melanoma of skin of scalp and neck                                            |
| Neoplastic disease | 1725      | Malignant melanoma of skin of trunk except scrotum                                      |
| Neoplastic disease | 1726      | Malignant melanoma of skin of upper limb including shoulder                             |
| Neoplastic disease | 1727      | Malignant melanoma of skin of lower limb including hip                                  |
| Neoplastic disease | 1728      | Malignant melanoma of other specified sites of skin                                     |
| Neoplastic disease | 1729      | Melanoma of skin site unspecified                                                       |
| Neoplastic disease | 173       | Other and unspecified malignant neoplasm of skin                                        |
| Neoplastic disease | 1730      | Other and unspecified malignant neoplasm of skin of lip                                 |
| Neoplastic disease | 1730<br>0 | Unspecified malignant neoplasm of skin of lip                                           |
| Neoplastic disease | 1730<br>1 | Basal cell carcinoma of skin of lip                                                     |
| Neoplastic disease | 1730<br>2 | Squamous cell carcinoma of skin of lip                                                  |
| Neoplastic disease | 1730<br>9 | Other specified malignant neoplasm of skin of lip                                       |
| Neoplastic disease | 1731      | Other and unspecified malignant neoplasm of skin of eyelid including canthus            |
| Neoplastic disease | 1731<br>0 | Unspecified malignant neoplasm of eyelid including canthus                              |
| Neoplastic disease | 1731<br>1 | Basal cell carcinoma of eyelid including canthus                                        |
| Neoplastic disease | 1731<br>2 | Squamous cell carcinoma of eyelid including canthus                                     |
| Neoplastic disease | 1731<br>9 | Other specified malignant neoplasm of eyelid including canthus                          |
| Neoplastic disease | 1732      | Other and unspecified malignant neoplasm of skin of ear and external auditory canal     |
| Neoplastic disease | 1732<br>0 | Unspecified malignant neoplasm of skin of ear and external auditory canal               |
| Neoplastic disease | 1732<br>1 | Basal cell carcinoma of skin of ear and external auditory canal                         |
| Neoplastic disease | 1732<br>2 | Squamous cell carcinoma of skin of ear and external auditory canal                      |
| Neoplastic disease | 1732<br>9 | Other specified malignant neoplasm of skin of ear and external auditory canal           |
| Neoplastic disease | 1733      | Other and unspecified malignant neoplasm of skin of other and unspecified parts of face |
| Neoplastic disease | 1733<br>0 | Unspecified malignant neoplasm of skin of other and unspecified parts of face           |
| Neoplastic disease | 1733<br>1 | Basal cell carcinoma of skin of other and unspecified parts of face                     |
| Neoplastic disease | 1733<br>2 | Squamous cell carcinoma of skin of other and unspecified parts of face                  |
| Neoplastic disease | 1733<br>9 | Other specified malignant neoplasm of skin of other and unspecified parts of face       |
| Neoplastic disease | 1734      | Other and unspecified malignant neoplasm of scalp and skin of neck                      |
| Neoplastic disease | 1734<br>0 | Unspecified malignant neoplasm of scalp and skin of neck                                |
| Neoplastic disease | 1734<br>1 | Basal cell carcinoma of scalp and skin of neck                                          |
| Neoplastic disease | 1734<br>2 | Squamous cell carcinoma of scalp and skin of neck                                       |

|                    |           |                                                                                   |
|--------------------|-----------|-----------------------------------------------------------------------------------|
| Neoplastic disease | 1734<br>9 | Other specified malignant neoplasm of scalp and skin of neck                      |
| Neoplastic disease | 1735      | Other and unspecified malignant neoplasm of skin of trunk except scrotum          |
| Neoplastic disease | 1735<br>0 | Unspecified malignant neoplasm of skin of trunk except scrotum                    |
| Neoplastic disease | 1735<br>1 | Basal cell carcinoma of skin of trunk except scrotum                              |
| Neoplastic disease | 1735<br>2 | Squamous cell carcinoma of skin of trunk except scrotum                           |
| Neoplastic disease | 1735<br>9 | Other specified malignant neoplasm of skin of trunk except scrotum                |
| Neoplastic disease | 1736      | Other and unspecified malignant neoplasm of skin of upper limb including shoulder |
| Neoplastic disease | 1736<br>0 | Unspecified malignant neoplasm of skin of upper limb including shoulder           |
| Neoplastic disease | 1736<br>1 | Basal cell carcinoma of skin of upper limb including shoulder                     |
| Neoplastic disease | 1736<br>2 | Squamous cell carcinoma of skin of upper limb including shoulder                  |
| Neoplastic disease | 1736<br>9 | Other specified malignant neoplasm of skin of upper limb including shoulder       |
| Neoplastic disease | 1737      | Other and unspecified malignant neoplasm of skin of lower limb including hip      |
| Neoplastic disease | 1737<br>0 | Unspecified malignant neoplasm of skin of lower limb including hip                |
| Neoplastic disease | 1737<br>1 | Basal cell carcinoma of skin of lower limb including hip                          |
| Neoplastic disease | 1737<br>2 | Squamous cell carcinoma of skin of lower limb including hip                       |
| Neoplastic disease | 1737<br>9 | Other specified malignant neoplasm of skin of lower limb including hip            |
| Neoplastic disease | 1738      | Other and unspecified malignant neoplasm of other specified sites of skin         |
| Neoplastic disease | 1738<br>0 | Unspecified malignant neoplasm of other specified sites of skin                   |
| Neoplastic disease | 1738<br>1 | Basal cell carcinoma of other specified sites of skin                             |
| Neoplastic disease | 1738<br>2 | Squamous cell carcinoma of other specified sites of skin                          |
| Neoplastic disease | 1738<br>9 | Other specified malignant neoplasm of other specified sites of skin               |
| Neoplastic disease | 1739      | Other and unspecified malignant neoplasm of skin site unspecified                 |
| Neoplastic disease | 1739<br>0 | Unspecified malignant neoplasm of skin site unspecified                           |
| Neoplastic disease | 1739<br>1 | Basal cell carcinoma of skin site unspecified                                     |
| Neoplastic disease | 1739<br>2 | Squamous cell carcinoma of skin site unspecified                                  |
| Neoplastic disease | 1739<br>9 | Other specified malignant neoplasm of skin site unspecified                       |
| Neoplastic disease | 174       | Malignant neoplasm of female breast                                               |
| Neoplastic disease | 1740      | Malignant neoplasm of nipple and areola of female breast                          |
| Neoplastic disease | 1741      | Malignant neoplasm of central portion of female breast                            |
| Neoplastic disease | 1742      | Malignant neoplasm of upper-inner quadrant of female breast                       |
| Neoplastic disease | 1743      | Malignant neoplasm of lower-inner quadrant of female breast                       |
| Neoplastic disease | 1744      | Malignant neoplasm of upper-outer quadrant of female breast                       |



|                    |      |                                                                      |
|--------------------|------|----------------------------------------------------------------------|
| Neoplastic disease | 1745 | Malignant neoplasm of lower-outer quadrant of female breast          |
| Neoplastic disease | 1746 | Malignant neoplasm of axillary tail of female breast                 |
| Neoplastic disease | 1748 | Malignant neoplasm of other specified sites of female breast         |
| Neoplastic disease | 1749 | Malignant neoplasm of breast (female) unspecified site               |
| Neoplastic disease | 175  | Malignant neoplasm of male breast                                    |
| Neoplastic disease | 1750 | Malignant neoplasm of nipple and areola of male breast               |
| Neoplastic disease | 1759 | Malignant neoplasm of other and unspecified sites of male breast     |
| Neoplastic disease | 176  | Kaposi's sarcoma                                                     |
| Neoplastic disease | 1760 | Kaposi's sarcoma skin                                                |
| Neoplastic disease | 1761 | Kaposi's sarcoma soft tissue                                         |
| Neoplastic disease | 1762 | Kaposi's sarcoma palate                                              |
| Neoplastic disease | 1763 | Kaposi's sarcoma gastrointestinal sites                              |
| Neoplastic disease | 1764 | Kaposi's sarcoma lung                                                |
| Neoplastic disease | 1765 | Kaposi's sarcoma lymph nodes                                         |
| Neoplastic disease | 1768 | Kaposi's sarcoma other specified sites                               |
| Neoplastic disease | 1769 | Kaposi's sarcoma unspecified site                                    |
| Neoplastic disease | 179  | Malignant neoplasm of uterus-part unspecified                        |
| Neoplastic disease | 180  | Malignant neoplasm of cervix uteri                                   |
| Neoplastic disease | 1800 | Malignant neoplasm of endocervix                                     |
| Neoplastic disease | 1801 | Malignant neoplasm of exocervix                                      |
| Neoplastic disease | 1808 | Malignant neoplasm of other specified sites of cervix                |
| Neoplastic disease | 1809 | Malignant neoplasm of cervix uteri unspecified site                  |
| Neoplastic disease | 181  | Malignant neoplasm of placenta                                       |
| Neoplastic disease | 182  | Malignant neoplasm of body of uterus                                 |
| Neoplastic disease | 1820 | Malignant neoplasm of corpus uteri except isthmus                    |
| Neoplastic disease | 1821 | Malignant neoplasm of isthmus                                        |
| Neoplastic disease | 1828 | Malignant neoplasm of other specified sites of body of uterus        |
| Neoplastic disease | 183  | Malignant neoplasm of ovary and other uterine adnexa                 |
| Neoplastic disease | 1830 | Malignant neoplasm of ovary                                          |
| Neoplastic disease | 1832 | Malignant neoplasm of fallopian tube                                 |
| Neoplastic disease | 1833 | Malignant neoplasm of broad ligament of uterus                       |
| Neoplastic disease | 1834 | Malignant neoplasm of parametrium                                    |
| Neoplastic disease | 1835 | Malignant neoplasm of round ligament of uterus                       |
| Neoplastic disease | 1838 | Malignant neoplasm of other specified sites of uterine adnexa        |
| Neoplastic disease | 1839 | Malignant neoplasm of uterine adnexa unspecified site                |
| Neoplastic disease | 184  | Malignant neoplasm of other and unspecified female genital organs    |
| Neoplastic disease | 1840 | Malignant neoplasm of vagina                                         |
| Neoplastic disease | 1841 | Malignant neoplasm of labia majora                                   |
| Neoplastic disease | 1842 | Malignant neoplasm of labia minora                                   |
| Neoplastic disease | 1843 | Malignant neoplasm of clitoris                                       |
| Neoplastic disease | 1844 | Malignant neoplasm of vulva unspecified site                         |
| Neoplastic disease | 1848 | Malignant neoplasm of other specified sites of female genital organs |
| Neoplastic disease | 1849 | Malignant neoplasm of female genital organ site unspecified          |
| Neoplastic disease | 185  | Malignant neoplasm of prostate                                       |
| Neoplastic disease | 186  | Malignant neoplasm of testis                                         |
| Neoplastic disease | 1860 | Malignant neoplasm of undescended testis                             |
| Neoplastic disease | 1869 | Malignant neoplasm of other and unspecified testis                   |
| Neoplastic disease | 187  | Malignant neoplasm of penis and other male genital organs            |
| Neoplastic disease | 1871 | Malignant neoplasm of prepuce                                        |
| Neoplastic disease | 1872 | Malignant neoplasm of glans penis                                    |
| Neoplastic disease | 1873 | Malignant neoplasm of body of penis                                  |
| Neoplastic disease | 1874 | Malignant neoplasm of penis part unspecified                         |
| Neoplastic disease | 1875 | Malignant neoplasm of epididymis                                     |
| Neoplastic disease | 1876 | Malignant neoplasm of spermatic cord                                 |
| Neoplastic disease | 1877 | Malignant neoplasm of scrotum                                        |
| Neoplastic disease | 1878 | Malignant neoplasm of other specified sites of male genital organs   |

|                    |      |                                                                            |
|--------------------|------|----------------------------------------------------------------------------|
| Neoplastic disease | 1879 | Malignant neoplasm of male genital organ site unspecified                  |
| Neoplastic disease | 188  | Malignant neoplasm of bladder                                              |
| Neoplastic disease | 1880 | Malignant neoplasm of trigone of urinary bladder                           |
| Neoplastic disease | 1881 | Malignant neoplasm of dome of urinary bladder                              |
| Neoplastic disease | 1882 | Malignant neoplasm of lateral wall of urinary bladder                      |
| Neoplastic disease | 1883 | Malignant neoplasm of anterior wall of urinary bladder                     |
| Neoplastic disease | 1884 | Malignant neoplasm of posterior wall of urinary bladder                    |
| Neoplastic disease | 1885 | Malignant neoplasm of bladder neck                                         |
| Neoplastic disease | 1886 | Malignant neoplasm of ureteric orifice                                     |
| Neoplastic disease | 1887 | Malignant neoplasm of urachus                                              |
| Neoplastic disease | 1888 | Malignant neoplasm of other specified sites of bladder                     |
| Neoplastic disease | 1889 | Malignant neoplasm of bladder part unspecified                             |
| Neoplastic disease | 189  | Malignant neoplasm of kidney and other and unspecified urinary organs      |
| Neoplastic disease | 1890 | Malignant neoplasm of kidney except pelvis                                 |
| Neoplastic disease | 1891 | Malignant neoplasm of renal pelvis                                         |
| Neoplastic disease | 1892 | Malignant neoplasm of ureter                                               |
| Neoplastic disease | 1893 | Malignant neoplasm of urethra                                              |
| Neoplastic disease | 1894 | Malignant neoplasm of paraurethral glands                                  |
| Neoplastic disease | 1898 | Malignant neoplasm of other specified sites of urinary organs              |
| Neoplastic disease | 1899 | Malignant neoplasm of urinary organ site unspecified                       |
| Neoplastic disease | 190  | Malignant neoplasm of eye                                                  |
| Neoplastic disease | 1900 | Malignant neoplasm of eyeball except conjunctiva cornea retina and choroid |
| Neoplastic disease | 1901 | Malignant neoplasm of orbit                                                |
| Neoplastic disease | 1902 | Malignant neoplasm of lacrimal gland                                       |
| Neoplastic disease | 1903 | Malignant neoplasm of conjunctiva                                          |
| Neoplastic disease | 1904 | Malignant neoplasm of cornea                                               |
| Neoplastic disease | 1905 | Malignant neoplasm of retina                                               |
| Neoplastic disease | 1906 | Malignant neoplasm of choroid                                              |
| Neoplastic disease | 1907 | Malignant neoplasm of lacrimal duct                                        |
| Neoplastic disease | 1908 | Malignant neoplasm of other specified sites of eye                         |
| Neoplastic disease | 1909 | Malignant neoplasm of eye part unspecified                                 |
| Neoplastic disease | 191  | Malignant neoplasm of brain                                                |
| Neoplastic disease | 1910 | Malignant neoplasm of cerebrum except lobes and ventricles                 |
| Neoplastic disease | 1911 | Malignant neoplasm of frontal lobe                                         |
| Neoplastic disease | 1912 | Malignant neoplasm of temporal lobe                                        |
| Neoplastic disease | 1913 | Malignant neoplasm of parietal lobe                                        |
| Neoplastic disease | 1914 | Malignant neoplasm of occipital lobe                                       |
| Neoplastic disease | 1915 | Malignant neoplasm of ventricles                                           |
| Neoplastic disease | 1916 | Malignant neoplasm of cerebellum not otherwise specified                   |
| Neoplastic disease | 1917 | Malignant neoplasm of brain stem                                           |
| Neoplastic disease | 1918 | Malignant neoplasm of other parts of brain                                 |
| Neoplastic disease | 1919 | Malignant neoplasm of brain unspecified site                               |
| Neoplastic disease | 192  | Malignant neoplasm of other and unspecified parts of nervous system        |
| Neoplastic disease | 1920 | Malignant neoplasm of cranial nerves                                       |
| Neoplastic disease | 1921 | Malignant neoplasm of cerebral meninges                                    |
| Neoplastic disease | 1922 | Malignant neoplasm of spinal cord                                          |
| Neoplastic disease | 1923 | Malignant neoplasm of spinal meninges                                      |
| Neoplastic disease | 1928 | Malignant neoplasm of other specified sites of nervous system              |
| Neoplastic disease | 1929 | Malignant neoplasm of nervous system part unspecified                      |
| Neoplastic disease | 193  | Malignant neoplasm of thyroid gland                                        |
| Neoplastic disease | 194  | Malignant neoplasm of other endocrine glands and related structures        |
| Neoplastic disease | 1940 | Malignant neoplasm of adrenal gland                                        |
| Neoplastic disease | 1941 | Malignant neoplasm of parathyroid gland                                    |
| Neoplastic disease | 1943 | Malignant neoplasm of pituitary gland and craniopharyngeal duct            |
| Neoplastic disease | 1944 | Malignant neoplasm of pineal gland                                         |

|                    |           |                                                                                               |
|--------------------|-----------|-----------------------------------------------------------------------------------------------|
| Neoplastic disease | 1945      | Malignant neoplasm of carotid body                                                            |
| Neoplastic disease | 1946      | Malignant neoplasm of aortic body and other paraganglia                                       |
| Neoplastic disease | 1948      | Malignant neoplasm of other endocrine glands and related structures                           |
| Neoplastic disease | 1949      | Malignant neoplasm of endocrine gland site unspecified                                        |
| Neoplastic disease | 195       | Malignant neoplasm of other and ill-defined sites                                             |
| Neoplastic disease | 1950      | Malignant neoplasm of head face and neck                                                      |
| Neoplastic disease | 1951      | Malignant neoplasm of thorax                                                                  |
| Neoplastic disease | 1952      | Malignant neoplasm of abdomen                                                                 |
| Neoplastic disease | 1953      | Malignant neoplasm of pelvis                                                                  |
| Neoplastic disease | 1954      | Malignant neoplasm of upper limb                                                              |
| Neoplastic disease | 1955      | Malignant neoplasm of lower limb                                                              |
| Neoplastic disease | 1958      | Malignant neoplasm of other specified sites                                                   |
| Neoplastic disease | 196       | Secondary and unspecified malignant neoplasm of lymph nodes                                   |
| Neoplastic disease | 1960      | Secondary and unspecified malignant neoplasm of lymph nodes of head face and neck             |
| Neoplastic disease | 1961      | Secondary and unspecified malignant neoplasm of intrathoracic lymph nodes                     |
| Neoplastic disease | 1962      | Secondary and unspecified malignant neoplasm of intra-abdominal lymph nodes                   |
| Neoplastic disease | 1963      | Secondary and unspecified malignant neoplasm of lymph nodes of axilla and upper limb          |
| Neoplastic disease | 1965      | Secondary and unspecified malignant neoplasm of lymph nodes of inguinal region and lower limb |
| Neoplastic disease | 1966      | Secondary and unspecified malignant neoplasm of intrapelvic lymph nodes                       |
| Neoplastic disease | 1968      | Secondary and unspecified malignant neoplasm of lymph nodes of multiple sites                 |
| Neoplastic disease | 1969      | Secondary and unspecified malignant neoplasm of lymph nodes site unspecified                  |
| Neoplastic disease | 197       | Secondary malignant neoplasm of respiratory and digestive systems                             |
| Neoplastic disease | 1970      | Secondary malignant neoplasm of lung                                                          |
| Neoplastic disease | 1971      | Secondary malignant neoplasm of mediastinum                                                   |
| Neoplastic disease | 1972      | Secondary malignant neoplasm of pleura                                                        |
| Neoplastic disease | 1973      | Secondary malignant neoplasm of other respiratory organs                                      |
| Neoplastic disease | 1974      | Secondary malignant neoplasm of small intestine including duodenum                            |
| Neoplastic disease | 1975      | Secondary malignant neoplasm of large intestine and rectum                                    |
| Neoplastic disease | 1976      | Secondary malignant neoplasm of retroperitoneum and peritoneum                                |
| Neoplastic disease | 1977      | Malignant neoplasm of liver secondary                                                         |
| Neoplastic disease | 1978      | Secondary malignant neoplasm of other digestive organs and spleen                             |
| Neoplastic disease | 198       | Secondary malignant neoplasm of other specified sites                                         |
| Neoplastic disease | 1980      | Secondary malignant neoplasm of kidney                                                        |
| Neoplastic disease | 1981      | Secondary malignant neoplasm of other urinary organs                                          |
| Neoplastic disease | 1982      | Secondary malignant neoplasm of skin                                                          |
| Neoplastic disease | 1983      | Secondary malignant neoplasm of brain and spinal cord                                         |
| Neoplastic disease | 1984      | Secondary malignant neoplasm of other parts of nervous system                                 |
| Neoplastic disease | 1985      | Secondary malignant neoplasm of bone and bone marrow                                          |
| Neoplastic disease | 1986      | Secondary malignant neoplasm of ovary                                                         |
| Neoplastic disease | 1987      | Secondary malignant neoplasm of adrenal gland                                                 |
| Neoplastic disease | 1988      | Secondary malignant neoplasm of other specified sites                                         |
| Neoplastic disease | 1988<br>1 | Secondary malignant neoplasm of breast                                                        |
| Neoplastic disease | 1988<br>2 | Secondary malignant neoplasm of genital organs                                                |
| Neoplastic disease | 1988<br>9 | Secondary malignant neoplasm of other specified sites                                         |
| Neoplastic disease | 199       | Malignant neoplasm without specification of site                                              |

|                    |           |                                                                                            |
|--------------------|-----------|--------------------------------------------------------------------------------------------|
| Neoplastic disease | 1990      | Disseminated malignant neoplasm                                                            |
| Neoplastic disease | 1991      | Other malignant neoplasm of unspecified site                                               |
| Neoplastic disease | 1992      | Malignant neoplasm associated with transplanted organ                                      |
| Neoplastic disease | 200       | Lymphosarcoma and reticulosarcoma and other specified malignant tumors of lymphatic tissue |
| Neoplastic disease | 2000      | Reticulosarcoma                                                                            |
| Neoplastic disease | 2000<br>0 | Reticulosarcoma unspecified site                                                           |
| Neoplastic disease | 2000<br>1 | Reticulosarcoma involving lymph nodes of head face and neck                                |
| Neoplastic disease | 2000<br>2 | Reticulosarcoma involving intrathoracic lymph nodes                                        |
| Neoplastic disease | 2000<br>3 | Reticulosarcoma involving intra-abdominal lymph nodes                                      |
| Neoplastic disease | 2000<br>4 | Reticulosarcoma involving lymph nodes of axilla and upper limb                             |
| Neoplastic disease | 2000<br>5 | Reticulosarcoma involving lymph nodes of inguinal region and lower limb                    |
| Neoplastic disease | 2000<br>6 | Reticulosarcoma involving intrapelvic lymph nodes                                          |
| Neoplastic disease | 2000<br>7 | Reticulosarcoma involving spleen                                                           |
| Neoplastic disease | 2000<br>8 | Reticulosarcoma involving lymph nodes of multiple sites                                    |
| Neoplastic disease | 2001      | Lymphosarcoma                                                                              |
| Neoplastic disease | 2001<br>0 | Lymphosarcoma unspecified site                                                             |
| Neoplastic disease | 2001<br>1 | Lymphosarcoma involving lymph nodes of head face and neck                                  |
| Neoplastic disease | 2001<br>2 | Lymphosarcoma involving intrathoracic lymph nodes                                          |
| Neoplastic disease | 2001<br>3 | Lymphosarcoma involving intra-abdominal lymph nodes                                        |
| Neoplastic disease | 2001<br>4 | Lymphosarcoma involving lymph nodes of axilla and upper limb                               |
| Neoplastic disease | 2001<br>5 | Lymphosarcoma involving lymph nodes of inguinal region and lower limb                      |
| Neoplastic disease | 2001<br>6 | Lymphosarcoma involving intrapelvic lymph nodes                                            |
| Neoplastic disease | 2001<br>7 | Lymphosarcoma involving spleen                                                             |
| Neoplastic disease | 2001<br>8 | Lymphosarcoma involving lymph nodes of multiple sites                                      |
| Neoplastic disease | 2002      | Burkitt's tumor or lymphoma                                                                |
| Neoplastic disease | 2002<br>0 | Burkitt's tumor or lymphoma unspecified site                                               |
| Neoplastic disease | 2002<br>1 | Burkitt's tumor or lymphoma involving lymph nodes of head face and neck                    |
| Neoplastic disease | 2002<br>2 | Burkitt's tumor or lymphoma involving intrathoracic lymph nodes                            |
| Neoplastic disease | 2002<br>3 | Burkitt's tumor or lymphoma involving intra-abdominal lymph nodes                          |
| Neoplastic disease | 2002<br>4 | Burkitt's tumor or lymphoma involving lymph nodes of axilla and upper limb                 |
| Neoplastic disease | 2002<br>5 | Burkitt's tumor or lymphoma involving lymph nodes of inguinal region and lower limb        |

|                    |           |                                                                                                 |
|--------------------|-----------|-------------------------------------------------------------------------------------------------|
| Neoplastic disease | 2002<br>6 | Burkitt's tumor or lymphoma involving intrapelvic lymph nodes                                   |
| Neoplastic disease | 2002<br>7 | Burkitt's tumor or lymphoma involving spleen                                                    |
| Neoplastic disease | 2002<br>8 | Burkitt's tumor or lymphoma involving lymph nodes of multiple sites                             |
| Neoplastic disease | 2003      | Marginal zone lymphoma                                                                          |
| Neoplastic disease | 2003<br>0 | Marginal zone lymphoma unspecified site                                                         |
| Neoplastic disease | 2003<br>1 | Marginal zone lymphoma involving lymph nodes of head face and neck                              |
| Neoplastic disease | 2003<br>2 | Marginal zone lymphoma involving intrathoracic lymph nodes                                      |
| Neoplastic disease | 2003<br>3 | Marginal zone lymphoma involving intra-abdominal lymph nodes                                    |
| Neoplastic disease | 2003<br>4 | Marginal zone lymphoma involving lymph nodes of axilla and upper limb                           |
| Neoplastic disease | 2003<br>5 | Marginal zone lymphoma involving lymph nodes of inguinal region and lower limb                  |
| Neoplastic disease | 2003<br>6 | Marginal zone lymphoma involving intrapelvic lymph nodes                                        |
| Neoplastic disease | 2003<br>7 | Marginal zone lymphoma involving spleen                                                         |
| Neoplastic disease | 2003<br>8 | Marginal zone lymphoma involving lymph nodes of multiple sites                                  |
| Neoplastic disease | 2004      | Mantle cell lymphoma                                                                            |
| Neoplastic disease | 2004<br>0 | Mantle cell lymphoma unspecified site                                                           |
| Neoplastic disease | 2004<br>1 | Mantle cell lymphoma involving lymph nodes of head face and neck                                |
| Neoplastic disease | 2004<br>2 | Mantle cell lymphoma involving intrathoracic lymph nodes                                        |
| Neoplastic disease | 2004<br>3 | Mantle cell lymphoma involving intra-abdominal lymph nodes                                      |
| Neoplastic disease | 2004<br>4 | Mantle cell lymphoma involving lymph nodes of axilla and upper limb                             |
| Neoplastic disease | 2004<br>5 | Mantle cell lymphoma involving lymph nodes of inguinal region and lower limb                    |
| Neoplastic disease | 2004<br>6 | Mantle cell lymphoma involving intrapelvic lymph nodes                                          |
| Neoplastic disease | 2004<br>7 | Mantle cell lymphoma involving spleen                                                           |
| Neoplastic disease | 2004<br>8 | Mantle cell lymphoma involving lymph nodes of multiple sites                                    |
| Neoplastic disease | 2005      | Primary central nervous system lymphoma                                                         |
| Neoplastic disease | 2005<br>0 | Primary central nervous system lymphoma unspecified site                                        |
| Neoplastic disease | 2005<br>1 | Primary central nervous system lymphoma involving lymph nodes of head face and neck             |
| Neoplastic disease | 2005<br>2 | Primary central nervous system lymphoma involving intrathoracic lymph nodes                     |
| Neoplastic disease | 2005<br>3 | Primary central nervous system lymphoma involving intra-abdominal lymph nodes                   |
| Neoplastic disease | 2005<br>4 | Primary central nervous system lymphoma involving lymph nodes of axilla and upper limb          |
| Neoplastic disease | 2005<br>5 | Primary central nervous system lymphoma involving lymph nodes of inguinal region and lower limb |

|                    |           |                                                                                                                   |
|--------------------|-----------|-------------------------------------------------------------------------------------------------------------------|
| Neoplastic disease | 2005<br>6 | Primary central nervous system lymphoma involving intrapelvic lymph nodes                                         |
| Neoplastic disease | 2005<br>7 | Primary central nervous system lymphoma involving spleen                                                          |
| Neoplastic disease | 2005<br>8 | Primary central nervous system lymphoma involving lymph nodes of multiple sites                                   |
| Neoplastic disease | 2006      | Anaplastic large cell lymphoma                                                                                    |
| Neoplastic disease | 2006<br>0 | Anaplastic large cell lymphoma unspecified site                                                                   |
| Neoplastic disease | 2006<br>1 | Anaplastic large cell lymphoma involving lymph nodes of head face and neck                                        |
| Neoplastic disease | 2006<br>2 | Anaplastic large cell lymphoma involving intrathoracic lymph nodes                                                |
| Neoplastic disease | 2006<br>3 | Anaplastic large cell lymphoma involving intra-abdominal lymph nodes                                              |
| Neoplastic disease | 2006<br>4 | Anaplastic large cell lymphoma involving lymph nodes of axilla and upper limb                                     |
| Neoplastic disease | 2006<br>5 | Anaplastic large cell lymphoma involving lymph nodes of inguinal region and lower limb                            |
| Neoplastic disease | 2006<br>6 | Anaplastic large cell lymphoma involving intrapelvic lymph nodes                                                  |
| Neoplastic disease | 2006<br>7 | Anaplastic large cell lymphoma involving spleen                                                                   |
| Neoplastic disease | 2006<br>8 | Anaplastic large cell lymphoma involving lymph nodes of multiple sites                                            |
| Neoplastic disease | 2007      | Large cell lymphoma                                                                                               |
| Neoplastic disease | 2007<br>0 | Large cell lymphoma unspecified site                                                                              |
| Neoplastic disease | 2007<br>1 | Large cell lymphoma involving lymph nodes of head face and neck                                                   |
| Neoplastic disease | 2007<br>2 | Large cell lymphoma involving intrathoracic lymph nodes                                                           |
| Neoplastic disease | 2007<br>3 | Large cell lymphoma involving intra-abdominal lymph nodes                                                         |
| Neoplastic disease | 2007<br>4 | Large cell lymphoma involving lymph nodes of axilla and upper limb                                                |
| Neoplastic disease | 2007<br>5 | Large cell lymphoma involving lymph nodes of inguinal region and lower limb                                       |
| Neoplastic disease | 2007<br>6 | Large cell lymphoma involving intrapelvic lymph nodes                                                             |
| Neoplastic disease | 2007<br>7 | Large cell lymphoma involving spleen                                                                              |
| Neoplastic disease | 2007<br>8 | Large cell lymphoma involving lymph nodes of multiple sites                                                       |
| Neoplastic disease | 2008      | Other named variants of lymphosarcoma and reticulosarcoma                                                         |
| Neoplastic disease | 2008<br>0 | Other named variants of lymphosarcoma and reticulosarcoma unspecified site                                        |
| Neoplastic disease | 2008<br>1 | Other named variants of lymphosarcoma and reticulosarcoma involving lymph nodes of head face and neck             |
| Neoplastic disease | 2008<br>2 | Other named variants of lymphosarcoma and reticulosarcoma involving intrathoracic lymph nodes                     |
| Neoplastic disease | 2008<br>3 | Other named variants of lymphosarcoma and reticulosarcoma involving intra-abdominal lymph nodes                   |
| Neoplastic disease | 2008<br>4 | Other named variants of lymphosarcoma and reticulosarcoma involving lymph nodes of axilla and upper limb          |
| Neoplastic disease | 2008<br>5 | Other named variants of lymphosarcoma and reticulosarcoma involving lymph nodes of inguinal region and lower limb |

|                    |           |                                                                                                   |
|--------------------|-----------|---------------------------------------------------------------------------------------------------|
| Neoplastic disease | 2008<br>6 | Other named variants of lymphosarcoma and reticulosarcoma involving intrapelvic lymph nodes       |
| Neoplastic disease | 2008<br>7 | Other named variants of lymphosarcoma and reticulosarcoma involving spleen                        |
| Neoplastic disease | 2008<br>8 | Other named variants of lymphosarcoma and reticulosarcoma involving lymph nodes of multiple sites |
| Neoplastic disease | 201       | Hodgkin's disease                                                                                 |
| Neoplastic disease | 2010      | Hodgkin's paragranuloma                                                                           |
| Neoplastic disease | 2010<br>0 | Hodgkin's paragranuloma unspecified site                                                          |
| Neoplastic disease | 2010<br>1 | Hodgkin's paragranuloma involving lymph nodes of head face and neck                               |
| Neoplastic disease | 2010<br>2 | Hodgkin's paragranuloma involving intrathoracic lymph nodes                                       |
| Neoplastic disease | 2010<br>3 | Hodgkin's paragranuloma involving intra-abdominal lymph nodes                                     |
| Neoplastic disease | 2010<br>4 | Hodgkin's paragranuloma involving lymph nodes of axilla and upper limb                            |
| Neoplastic disease | 2010<br>5 | Hodgkin's paragranuloma involving lymph nodes of inguinal region and lower limb                   |
| Neoplastic disease | 2010<br>6 | Hodgkin's paragranuloma involving intrapelvic lymph nodes                                         |
| Neoplastic disease | 2010<br>7 | Hodgkin's paragranuloma involving spleen                                                          |
| Neoplastic disease | 2010<br>8 | Hodgkin's paragranuloma involving lymph nodes of multiple sites                                   |
| Neoplastic disease | 2011      | Hodgkin's granuloma                                                                               |
| Neoplastic disease | 2011<br>0 | Hodgkin's granuloma unspecified site                                                              |
| Neoplastic disease | 2011<br>1 | Hodgkin's granuloma involving lymph nodes of head face and neck                                   |
| Neoplastic disease | 2011<br>2 | Hodgkin's granuloma involving intrathoracic lymph nodes                                           |
| Neoplastic disease | 2011<br>3 | Hodgkin's granuloma involving intra-abdominal lymph nodes                                         |
| Neoplastic disease | 2011<br>4 | Hodgkin's granuloma involving lymph nodes of axilla and upper limb                                |
| Neoplastic disease | 2011<br>5 | Hodgkin's granuloma involving lymph nodes of inguinal region and lower limb                       |
| Neoplastic disease | 2011<br>6 | Hodgkin's granuloma involving intrapelvic lymph nodes                                             |
| Neoplastic disease | 2011<br>7 | Hodgkin's granuloma involving spleen                                                              |
| Neoplastic disease | 2011<br>8 | Hodgkin's granuloma involving lymph nodes of multiple sites                                       |
| Neoplastic disease | 2012      | Hodgkin's sarcoma                                                                                 |
| Neoplastic disease | 2012<br>0 | Hodgkin's sarcoma unspecified site                                                                |
| Neoplastic disease | 2012<br>1 | Hodgkin's sarcoma involving lymph nodes of head face and neck                                     |
| Neoplastic disease | 2012<br>2 | Hodgkin's sarcoma involving intrathoracic lymph nodes                                             |
| Neoplastic disease | 2012<br>3 | Hodgkin's sarcoma involving intra-abdominal lymph nodes                                           |
| Neoplastic disease | 2012<br>4 | Hodgkin's sarcoma involving lymph nodes of axilla and upper limb                                  |

|                    |           |                                                                                                                |
|--------------------|-----------|----------------------------------------------------------------------------------------------------------------|
| Neoplastic disease | 2012<br>5 | Hodgkin's sarcoma involving lymph nodes of inguinal region and lower limb                                      |
| Neoplastic disease | 2012<br>6 | Hodgkin's sarcoma involving intrapelvic lymph nodes                                                            |
| Neoplastic disease | 2012<br>7 | Hodgkin's sarcoma involving spleen                                                                             |
| Neoplastic disease | 2012<br>8 | Hodgkin's sarcoma involving lymph nodes of multiple sites                                                      |
| Neoplastic disease | 2014      | Hodgkin's disease lymphocytic-histiocytic predominance                                                         |
| Neoplastic disease | 2014<br>0 | Hodgkin's disease lymphocytic-histiocytic predominance unspecified site                                        |
| Neoplastic disease | 2014<br>1 | Hodgkin's disease lymphocytic-histiocytic predominance involving lymph nodes of head face and neck             |
| Neoplastic disease | 2014<br>2 | Hodgkin's disease lymphocytic-histiocytic predominance involving intrathoracic lymph nodes                     |
| Neoplastic disease | 2014<br>3 | Hodgkin's disease lymphocytic-histiocytic predominance involving intra-abdominal lymph nodes                   |
| Neoplastic disease | 2014<br>4 | Hodgkin's disease lymphocytic-histiocytic predominance involving lymph nodes of axilla and upper limb          |
| Neoplastic disease | 2014<br>5 | Hodgkin's disease lymphocytic-histiocytic predominance involving lymph nodes of inguinal region and lower limb |
| Neoplastic disease | 2014<br>6 | Hodgkin's disease lymphocytic-histiocytic predominance involving intrapelvic lymph nodes                       |
| Neoplastic disease | 2014<br>7 | Hodgkin's disease lymphocytic-histiocytic predominance involving spleen                                        |
| Neoplastic disease | 2014<br>8 | Hodgkin's disease lymphocytic-histiocytic predominance involving lymph nodes of multiple sites                 |
| Neoplastic disease | 2015      | Hodgkin's disease nodular sclerosis                                                                            |
| Neoplastic disease | 2015<br>0 | Hodgkin's disease nodular sclerosis unspecified site                                                           |
| Neoplastic disease | 2015<br>1 | Hodgkin's disease nodular sclerosis involving lymph nodes of head face and neck                                |
| Neoplastic disease | 2015<br>2 | Hodgkin's disease nodular sclerosis involving intrathoracic lymph nodes                                        |
| Neoplastic disease | 2015<br>3 | Hodgkin's disease nodular sclerosis involving intra-abdominal lymph nodes                                      |
| Neoplastic disease | 2015<br>4 | Hodgkin's disease nodular sclerosis involving lymph nodes of axilla and upper limb                             |
| Neoplastic disease | 2015<br>5 | Hodgkin's disease nodular sclerosis involving lymph nodes of inguinal region and lower limb                    |
| Neoplastic disease | 2015<br>6 | Hodgkin's disease nodular sclerosis involving intrapelvic lymph nodes                                          |
| Neoplastic disease | 2015<br>7 | Hodgkin's disease nodular sclerosis involving spleen                                                           |
| Neoplastic disease | 2015<br>8 | Hodgkin's disease nodular sclerosis involving lymph nodes of multiple sites                                    |
| Neoplastic disease | 2016      | Hodgkin's disease mixed cellularity                                                                            |
| Neoplastic disease | 2016<br>0 | Hodgkin's disease mixed cellularity unspecified site                                                           |
| Neoplastic disease | 2016<br>1 | Hodgkin's disease mixed cellularity involving lymph nodes of head face and neck                                |
| Neoplastic disease | 2016<br>2 | Hodgkin's disease mixed cellularity involving intrathoracic lymph nodes                                        |
| Neoplastic disease | 2016<br>3 | Hodgkin's disease mixed cellularity involving intra-abdominal lymph nodes                                      |
| Neoplastic disease | 2016<br>4 | Hodgkin's disease mixed cellularity involving lymph nodes of axilla and upper limb                             |



|                    |           |                                                                                                 |
|--------------------|-----------|-------------------------------------------------------------------------------------------------|
| Neoplastic disease | 2016<br>5 | Hodgkin's disease mixed cellularity involving lymph nodes of inguinal region and lower limb     |
| Neoplastic disease | 2016<br>6 | Hodgkin's disease mixed cellularity involving intrapelvic lymph nodes                           |
| Neoplastic disease | 2016<br>7 | Hodgkin's disease mixed cellularity involving spleen                                            |
| Neoplastic disease | 2016<br>8 | Hodgkin's disease mixed cellularity involving lymph nodes of multiple sites                     |
| Neoplastic disease | 2017      | Hodgkin's disease lymphocytic depletion                                                         |
| Neoplastic disease | 2017<br>0 | Hodgkin's disease lymphocytic depletion unspecified site                                        |
| Neoplastic disease | 2017<br>1 | Hodgkin's disease lymphocytic depletion involving lymph nodes of head face and neck             |
| Neoplastic disease | 2017<br>2 | Hodgkin's disease lymphocytic depletion involving intrathoracic lymph nodes                     |
| Neoplastic disease | 2017<br>3 | Hodgkin's disease lymphocytic depletion involving intra-abdominal lymph nodes                   |
| Neoplastic disease | 2017<br>4 | Hodgkin's disease lymphocytic depletion involving lymph nodes of axilla and upper limb          |
| Neoplastic disease | 2017<br>5 | Hodgkin's disease lymphocytic depletion involving lymph nodes of inguinal region and lower limb |
| Neoplastic disease | 2017<br>6 | Hodgkin's disease lymphocytic depletion involving intrapelvic lymph nodes                       |
| Neoplastic disease | 2017<br>7 | Hodgkin's disease lymphocytic depletion involving spleen                                        |
| Neoplastic disease | 2017<br>8 | Hodgkin's disease lymphocytic depletion involving lymph nodes of multiple sites                 |
| Neoplastic disease | 2019      | Hodgkin's disease unspecified type                                                              |
| Neoplastic disease | 2019<br>0 | Hodgkin's disease unspecified type unspecified site                                             |
| Neoplastic disease | 2019<br>1 | Hodgkin's disease unspecified type involving lymph nodes of head face and neck                  |
| Neoplastic disease | 2019<br>2 | Hodgkin's disease unspecified type involving intrathoracic lymph nodes                          |
| Neoplastic disease | 2019<br>3 | Hodgkin's disease unspecified type involving intra-abdominal lymph nodes                        |
| Neoplastic disease | 2019<br>4 | Hodgkin's disease unspecified type involving lymph nodes of axilla and upper limb               |
| Neoplastic disease | 2019<br>5 | Hodgkin's disease unspecified type involving lymph nodes of inguinal region and lower limb      |
| Neoplastic disease | 2019<br>6 | Hodgkin's disease unspecified type involving intrapelvic lymph nodes                            |
| Neoplastic disease | 2019<br>7 | Hodgkin's disease unspecified type involving spleen                                             |
| Neoplastic disease | 2019<br>8 | Hodgkin's disease unspecified type involving lymph nodes of multiple sites                      |
| Neoplastic disease | 202       | Other malignant neoplasms of lymphoid and histiocytic tissue                                    |
| Neoplastic disease | 2020      | Nodular lymphoma                                                                                |
| Neoplastic disease | 2020<br>0 | Nodular lymphoma unspecified site                                                               |
| Neoplastic disease | 2020<br>1 | Nodular lymphoma involving lymph nodes of head face and neck                                    |
| Neoplastic disease | 2020<br>2 | Nodular lymphoma involving intrathoracic lymph nodes                                            |
| Neoplastic disease | 2020<br>3 | Nodular lymphoma involving intra-abdominal lymph nodes                                          |

|                    |           |                                                                           |
|--------------------|-----------|---------------------------------------------------------------------------|
| Neoplastic disease | 2020<br>4 | Nodular lymphoma involving lymph nodes of axilla and upper limb           |
| Neoplastic disease | 2020<br>5 | Nodular lymphoma involving lymph nodes of inguinal region and lower limb  |
| Neoplastic disease | 2020<br>6 | Nodular lymphoma involving intrapelvic lymph nodes                        |
| Neoplastic disease | 2020<br>7 | Nodular lymphoma involving spleen                                         |
| Neoplastic disease | 2020<br>8 | Nodular lymphoma involving lymph nodes of multiple sites                  |
| Neoplastic disease | 2021      | Mycosis fungoides                                                         |
| Neoplastic disease | 2021<br>0 | Mycosis fungoides unspecified site                                        |
| Neoplastic disease | 2021<br>1 | Mycosis fungoides involving lymph nodes of head face and neck             |
| Neoplastic disease | 2021<br>2 | Mycosis fungoides involving intrathoracic lymph nodes                     |
| Neoplastic disease | 2021<br>3 | Mycosis fungoides involving intra-abdominal lymph nodes                   |
| Neoplastic disease | 2021<br>4 | Mycosis fungoides involving lymph nodes of axilla and upper limb          |
| Neoplastic disease | 2021<br>5 | Mycosis fungoides involving lymph nodes of inguinal region and lower limb |
| Neoplastic disease | 2021<br>6 | Mycosis fungoides involving intrapelvic lymph nodes                       |
| Neoplastic disease | 2021<br>7 | Mycosis fungoides involving spleen                                        |
| Neoplastic disease | 2021<br>8 | Mycosis fungoides involving lymph nodes of multiple sites                 |
| Neoplastic disease | 2022      | Sezary's disease                                                          |
| Neoplastic disease | 2022<br>0 | Sezary's disease unspecified site                                         |
| Neoplastic disease | 2022<br>1 | Sezary's disease involving lymph nodes of head face and neck              |
| Neoplastic disease | 2022<br>2 | Sezary's disease involving intrathoracic lymph nodes                      |
| Neoplastic disease | 2022<br>3 | Sezary's disease involving intra-abdominal lymph nodes                    |
| Neoplastic disease | 2022<br>4 | Sezary's disease involving lymph nodes of axilla and upper limb           |
| Neoplastic disease | 2022<br>5 | Sezary's disease involving lymph nodes of inguinal region and lower limb  |
| Neoplastic disease | 2022<br>6 | Sezary's disease involving intrapelvic lymph nodes                        |
| Neoplastic disease | 2022<br>7 | Sezary's disease involving spleen                                         |
| Neoplastic disease | 2022<br>8 | Sezary's disease involving lymph nodes of multiple sites                  |
| Neoplastic disease | 2023      | Malignant histiocytosis                                                   |
| Neoplastic disease | 2023<br>0 | Malignant histiocytosis unspecified site                                  |
| Neoplastic disease | 2023<br>1 | Malignant histiocytosis involving lymph nodes of head face and neck       |
| Neoplastic disease | 2023<br>2 | Malignant histiocytosis involving intrathoracic lymph nodes               |
| Neoplastic disease | 2023<br>3 | Malignant histiocytosis involving intra-abdominal lymph nodes             |

|                    |           |                                                                                        |
|--------------------|-----------|----------------------------------------------------------------------------------------|
| Neoplastic disease | 2023<br>4 | Malignant histiocytosis involving lymph nodes of axilla and upper limb                 |
| Neoplastic disease | 2023<br>5 | Malignant histiocytosis involving lymph nodes of inguinal region and lower limb        |
| Neoplastic disease | 2023<br>6 | Malignant histiocytosis involving intrapelvic lymph nodes                              |
| Neoplastic disease | 2023<br>7 | Malignant histiocytosis involving spleen                                               |
| Neoplastic disease | 2023<br>8 | Malignant histiocytosis involving lymph nodes of multiple sites                        |
| Neoplastic disease | 2024      | Leukemic reticuloendotheliosis                                                         |
| Neoplastic disease | 2024<br>0 | Leukemic reticuloendotheliosis unspecified site                                        |
| Neoplastic disease | 2024<br>1 | Leukemic reticuloendotheliosis involving lymph nodes of head face and neck             |
| Neoplastic disease | 2024<br>2 | Leukemic reticuloendotheliosis involving intrathoracic lymph nodes                     |
| Neoplastic disease | 2024<br>3 | Leukemic reticuloendotheliosis involving intra-abdominal lymph nodes                   |
| Neoplastic disease | 2024<br>4 | Leukemic reticuloendotheliosis involving lymph nodes of axilla and upper arm           |
| Neoplastic disease | 2024<br>5 | Leukemic reticuloendotheliosis involving lymph nodes of inguinal region and lower limb |
| Neoplastic disease | 2024<br>6 | Leukemic reticuloendotheliosis involving intrapelvic lymph nodes                       |
| Neoplastic disease | 2024<br>7 | Leukemic reticuloendotheliosis involving spleen                                        |
| Neoplastic disease | 2024<br>8 | Leukemic reticuloendotheliosis involving lymph nodes of multiple sites                 |
| Neoplastic disease | 2025      | Letterer-Siwe disease                                                                  |
| Neoplastic disease | 2025<br>0 | Letterer-Siwe disease unspecified site                                                 |
| Neoplastic disease | 2025<br>1 | Letterer-Siwe disease involving lymph nodes of head face and neck                      |
| Neoplastic disease | 2025<br>2 | Letterer-Siwe disease involving intrathoracic lymph nodes                              |
| Neoplastic disease | 2025<br>3 | Letterer-Siwe disease involving intra-abdominal lymph nodes                            |
| Neoplastic disease | 2025<br>4 | Letterer-Siwe disease involving lymph nodes of axilla and upper limb                   |
| Neoplastic disease | 2025<br>5 | Letterer-Siwe disease involving lymph nodes of inguinal region and lower limb          |
| Neoplastic disease | 2025<br>6 | Letterer-Siwe disease involving intrapelvic lymph nodes                                |
| Neoplastic disease | 2025<br>7 | Letterer-Siwe disease involving spleen                                                 |
| Neoplastic disease | 2025<br>8 | Letterer-Siwe disease involving lymph nodes of multiple sites                          |
| Neoplastic disease | 2026      | Malignant mast cell tumors                                                             |
| Neoplastic disease | 2026<br>0 | Malignant mast cell tumors unspecified site                                            |
| Neoplastic disease | 2026<br>1 | Malignant mast cell tumors involving lymph nodes of head face and neck                 |
| Neoplastic disease | 2026<br>2 | Malignant mast cell tumors involving intrathoracic lymph nodes                         |
| Neoplastic disease | 2026<br>3 | Malignant mast cell tumors involving intra-abdominal lymph nodes                       |

|                    |           |                                                                                                                          |
|--------------------|-----------|--------------------------------------------------------------------------------------------------------------------------|
| Neoplastic disease | 2026<br>4 | Malignant mast cell tumors involving lymph nodes of axilla and upper limb                                                |
| Neoplastic disease | 2026<br>5 | Malignant mast cell tumors involving lymph nodes of inguinal region and lower limb                                       |
| Neoplastic disease | 2026<br>6 | Malignant mast cell tumors involving intrapelvic lymph nodes                                                             |
| Neoplastic disease | 2026<br>7 | Malignant mast cell tumors involving spleen                                                                              |
| Neoplastic disease | 2026<br>8 | Malignant mast cell tumors involving lymph nodes of multiple sites                                                       |
| Neoplastic disease | 2027      | Peripheral T-cell lymphoma                                                                                               |
| Neoplastic disease | 2027<br>0 | Peripheral T-cell lymphoma unspecified site                                                                              |
| Neoplastic disease | 2027<br>1 | Peripheral T-cell lymphoma involving lymph nodes of head face and neck                                                   |
| Neoplastic disease | 2027<br>2 | Peripheral T-cell lymphoma involving intrathoracic lymph nodes                                                           |
| Neoplastic disease | 2027<br>3 | Peripheral T-cell lymphoma involving intra-abdominal lymph nodes                                                         |
| Neoplastic disease | 2027<br>4 | Peripheral T-cell lymphoma involving lymph nodes of axilla and upper limb                                                |
| Neoplastic disease | 2027<br>5 | Peripheral T-cell lymphoma involving lymph nodes of inguinal region and lower limb                                       |
| Neoplastic disease | 2027<br>6 | Peripheral T-cell lymphoma involving intrapelvic lymph nodes                                                             |
| Neoplastic disease | 2027<br>7 | Peripheral T-cell lymphoma involving spleen                                                                              |
| Neoplastic disease | 2027<br>8 | Peripheral T-cell lymphoma involving lymph nodes of multiple sites                                                       |
| Neoplastic disease | 2028      | Other malignant lymphomas                                                                                                |
| Neoplastic disease | 2028<br>0 | Other malignant lymphomas unspecified site                                                                               |
| Neoplastic disease | 2028<br>1 | Other malignant lymphomas involving lymph nodes of head face and neck                                                    |
| Neoplastic disease | 2028<br>2 | Other malignant lymphomas involving intrathoracic lymph nodes                                                            |
| Neoplastic disease | 2028<br>3 | Other malignant lymphomas involving intra-abdominal lymph nodes                                                          |
| Neoplastic disease | 2028<br>4 | Other malignant lymphomas involving lymph nodes of axilla and upper limb                                                 |
| Neoplastic disease | 2028<br>5 | Other malignant lymphomas involving lymph nodes of inguinal region and lower limb                                        |
| Neoplastic disease | 2028<br>6 | Other malignant lymphomas involving intrapelvic lymph nodes                                                              |
| Neoplastic disease | 2028<br>7 | Other malignant lymphomas involving spleen                                                                               |
| Neoplastic disease | 2028<br>8 | Other malignant lymphomas involving lymph nodes of multiple sites                                                        |
| Neoplastic disease | 2029      | Other and unspecified malignant neoplasms of lymphoid and histiocytic tissue                                             |
| Neoplastic disease | 2029<br>0 | Other and unspecified malignant neoplasms of lymphoid and histiocytic tissue unspecified site                            |
| Neoplastic disease | 2029<br>1 | Other and unspecified malignant neoplasms of lymphoid and histiocytic tissue involving lymph nodes of head face and neck |
| Neoplastic disease | 2029<br>2 | Other and unspecified malignant neoplasms of lymphoid and histiocytic tissue involving intrathoracic lymph nodes         |

|                    |           |                                                                                                                                      |
|--------------------|-----------|--------------------------------------------------------------------------------------------------------------------------------------|
| Neoplastic disease | 2029<br>3 | Other and unspecified malignant neoplasms of lymphoid and histiocytic tissue involving intra-abdominal lymph nodes                   |
| Neoplastic disease | 2029<br>4 | Other and unspecified malignant neoplasms of lymphoid and histiocytic tissue involving lymph nodes of axilla and upper limb          |
| Neoplastic disease | 2029<br>5 | Other and unspecified malignant neoplasms of lymphoid and histiocytic tissue involving lymph nodes of inguinal region and lower limb |
| Neoplastic disease | 2029<br>6 | Other and unspecified malignant neoplasms of lymphoid and histiocytic tissue involving intrapelvic lymph nodes                       |
| Neoplastic disease | 2029<br>7 | Other and unspecified malignant neoplasms of lymphoid and histiocytic tissue involving spleen                                        |
| Neoplastic disease | 2029<br>8 | Other and unspecified malignant neoplasms of lymphoid and histiocytic tissue involving lymph nodes of multiple sites                 |
| Neoplastic disease | 203       | Multiple myeloma and immunoproliferative neoplasms                                                                                   |
| Neoplastic disease | 2030      | Multiple myeloma                                                                                                                     |
| Neoplastic disease | 2030<br>0 | Multiple myeloma without mention of having achieved remission                                                                        |
| Neoplastic disease | 2030<br>1 | Multiple myeloma in remission                                                                                                        |
| Neoplastic disease | 2030<br>2 | Multiple myeloma in relapse                                                                                                          |
| Neoplastic disease | 2031      | Plasma cell leukemia                                                                                                                 |
| Neoplastic disease | 2031<br>0 | Plasma cell leukemia without mention of having achieved remission                                                                    |
| Neoplastic disease | 2031<br>1 | Plasma cell leukemia in remission                                                                                                    |
| Neoplastic disease | 2031<br>2 | Plasma cell leukemia in relapse                                                                                                      |
| Neoplastic disease | 2038      | Other immunoproliferative neoplasms                                                                                                  |
| Neoplastic disease | 2038<br>0 | Other immunoproliferative neoplasms without mention of having achieved remission                                                     |
| Neoplastic disease | 2038<br>1 | Other immunoproliferative neoplasms in remission                                                                                     |
| Neoplastic disease | 2038<br>2 | Other immunoproliferative neoplasms in relapse                                                                                       |
| Neoplastic disease | 204       | Lymphoid leukemia                                                                                                                    |
| Neoplastic disease | 2040      | Acute lymphoid leukemia                                                                                                              |
| Neoplastic disease | 2040<br>0 | Acute lymphoid leukemia without mention of having achieved remission                                                                 |
| Neoplastic disease | 2040<br>1 | Acute lymphoid leukemia in remission                                                                                                 |
| Neoplastic disease | 2040<br>2 | Acute lymphoid leukemia in relapse                                                                                                   |
| Neoplastic disease | 2041      | Chronic lymphoid leukemia                                                                                                            |
| Neoplastic disease | 2041<br>0 | Chronic lymphoid leukemia without mention of having achieved remission                                                               |
| Neoplastic disease | 2041<br>1 | Chronic lymphoid leukemia in remission                                                                                               |
| Neoplastic disease | 2041<br>2 | Chronic lymphoid leukemia in relapse                                                                                                 |
| Neoplastic disease | 2042      | Subacute lymphoid leukemia                                                                                                           |
| Neoplastic disease | 2042<br>0 | Subacute lymphoid leukemia without mention of having achieved remission                                                              |
| Neoplastic disease | 2042<br>1 | Subacute lymphoid leukemia in remission                                                                                              |
| Neoplastic disease | 2042<br>2 | Subacute lymphoid leukemia in relapse                                                                                                |
| Neoplastic disease | 2048      | Other lymphoid leukemia                                                                                                              |

|                    |           |                                                                            |
|--------------------|-----------|----------------------------------------------------------------------------|
| Neoplastic disease | 2048<br>0 | Other lymphoid leukemia without mention of having achieved remission       |
| Neoplastic disease | 2048<br>1 | Other lymphoid leukemia in remission                                       |
| Neoplastic disease | 2048<br>2 | Other lymphoid leukemia in relapse                                         |
| Neoplastic disease | 2049      | Unspecified lymphoid leukemia                                              |
| Neoplastic disease | 2049<br>0 | Unspecified lymphoid leukemia without mention of having achieved remission |
| Neoplastic disease | 2049<br>1 | Unspecified lymphoid leukemia in remission                                 |
| Neoplastic disease | 2049<br>2 | Unspecified lymphoid leukemia in relapse                                   |
| Neoplastic disease | 205       | Myeloid leukemia                                                           |
| Neoplastic disease | 2050      | Acute myeloid leukemia                                                     |
| Neoplastic disease | 2050<br>0 | Acute myeloid leukemia without mention of having achieved remission        |
| Neoplastic disease | 2050<br>1 | Acute myeloid leukemia in remission                                        |
| Neoplastic disease | 2050<br>2 | Acute myeloid leukemia in relapse                                          |
| Neoplastic disease | 2051      | Chronic myeloid leukemia                                                   |
| Neoplastic disease | 2051<br>0 | Chronic myeloid leukemia without mention of having achieved remission      |
| Neoplastic disease | 2051<br>1 | Chronic myeloid leukemia in remission                                      |
| Neoplastic disease | 2051<br>2 | Chronic myeloid leukemia in relapse                                        |
| Neoplastic disease | 2052      | Subacute myeloid leukemia                                                  |
| Neoplastic disease | 2052<br>0 | Subacute myeloid leukemia without mention of having achieved remission     |
| Neoplastic disease | 2052<br>1 | Subacute myeloid leukemia in remission                                     |
| Neoplastic disease | 2052<br>2 | Subacute myeloid leukemia in relapse                                       |
| Neoplastic disease | 2053      | Myeloid sarcoma                                                            |
| Neoplastic disease | 2053<br>0 | Myeloid sarcoma without mention of having achieved remission               |
| Neoplastic disease | 2053<br>1 | Myeloid sarcoma in remission                                               |
| Neoplastic disease | 2053<br>2 | Myeloid sarcoma in relapse                                                 |
| Neoplastic disease | 2058      | Other myeloid leukemia                                                     |
| Neoplastic disease | 2058<br>0 | Other myeloid leukemia without mention of having achieved remission        |
| Neoplastic disease | 2058<br>1 | Other myeloid leukemia in remission                                        |
| Neoplastic disease | 2058<br>2 | Other myeloid leukemia in relapse                                          |
| Neoplastic disease | 2059      | Unspecified myeloid leukemia                                               |
| Neoplastic disease | 2059<br>0 | Unspecified myeloid leukemia without mention of having achieved remission  |
| Neoplastic disease | 2059<br>1 | Unspecified myeloid leukemia in remission                                  |
| Neoplastic disease | 2059<br>2 | Unspecified myeloid leukemia in relapse                                    |
| Neoplastic disease | 206       | Monocytic leukemia                                                         |

|                    |           |                                                                                   |
|--------------------|-----------|-----------------------------------------------------------------------------------|
| Neoplastic disease | 2060      | Acute monocytic leukemia                                                          |
| Neoplastic disease | 2060<br>0 | Acute monocytic leukemia without mention of having achieved remission             |
| Neoplastic disease | 2060<br>1 | Acute monocytic leukemia in remission                                             |
| Neoplastic disease | 2060<br>2 | Acute monocytic leukemia in relapse                                               |
| Neoplastic disease | 2061      | Chronic monocytic leukemia                                                        |
| Neoplastic disease | 2061<br>0 | Chronic monocytic leukemia without mention of having achieved remission           |
| Neoplastic disease | 2061<br>1 | Chronic monocytic leukemia in remission                                           |
| Neoplastic disease | 2061<br>2 | Chronic monocytic leukemia in relapse                                             |
| Neoplastic disease | 2062      | Subacute monocytic leukemia                                                       |
| Neoplastic disease | 2062<br>0 | Subacute monocytic leukemia without mention of having achieved remission          |
| Neoplastic disease | 2062<br>1 | Subacute monocytic leukemia in remission                                          |
| Neoplastic disease | 2062<br>2 | Subacute monocytic leukemia in relapse                                            |
| Neoplastic disease | 2068      | Other monocytic leukemia                                                          |
| Neoplastic disease | 2068<br>0 | Other monocytic leukemia without mention of having achieved remission             |
| Neoplastic disease | 2068<br>1 | Other monocytic leukemia in remission                                             |
| Neoplastic disease | 2068<br>2 | Other monocytic leukemia in relapse                                               |
| Neoplastic disease | 2069      | Unspecified monocytic leukemia                                                    |
| Neoplastic disease | 2069<br>0 | Unspecified monocytic leukemia without mention of having achieved remission       |
| Neoplastic disease | 2069<br>1 | Unspecified monocytic leukemia in remission                                       |
| Neoplastic disease | 2069<br>2 | Unspecified monocytic leukemia in relapse                                         |
| Neoplastic disease | 207       | Other specified leukemia                                                          |
| Neoplastic disease | 2070      | Acute erythremia and erythroleukemia                                              |
| Neoplastic disease | 2070<br>0 | Acute erythremia and erythroleukemia without mention of having achieved remission |
| Neoplastic disease | 2070<br>1 | Acute erythremia and erythroleukemia in remission                                 |
| Neoplastic disease | 2070<br>2 | Acute erythremia and erythroleukemia in relapse                                   |
| Neoplastic disease | 2071      | Chronic erythremia                                                                |
| Neoplastic disease | 2071<br>0 | Chronic erythremia without mention of having achieved remission                   |
| Neoplastic disease | 2071<br>1 | Chronic erythremia in remission                                                   |
| Neoplastic disease | 2071<br>2 | Chronic erythremia in relapse                                                     |
| Neoplastic disease | 2072      | Megakaryocytic leukemia                                                           |
| Neoplastic disease | 2072<br>0 | Megakaryocytic leukemia without mention of having achieved remission              |
| Neoplastic disease | 2072<br>1 | Megakaryocytic leukemia in remission                                              |
| Neoplastic disease | 2072<br>2 | Megakaryocytic leukemia in relapse                                                |

|                    |           |                                                                                         |
|--------------------|-----------|-----------------------------------------------------------------------------------------|
| Neoplastic disease | 2078      | Other specified leukemia                                                                |
| Neoplastic disease | 2078<br>0 | Other specified leukemia without mention of having achieved remission                   |
| Neoplastic disease | 2078<br>1 | Other specified leukemia in remission                                                   |
| Neoplastic disease | 2078<br>2 | Other specified leukemia in relapse                                                     |
| Neoplastic disease | 208       | Leukemia of unspecified cell type                                                       |
| Neoplastic disease | 2080      | Acute leukemia of unspecified cell type                                                 |
| Neoplastic disease | 2080<br>0 | Acute leukemia of unspecified cell type without mention of having achieved remission    |
| Neoplastic disease | 2080<br>1 | Acute leukemia of unspecified cell type in remission                                    |
| Neoplastic disease | 2080<br>2 | Acute leukemia of unspecified cell type in relapse                                      |
| Neoplastic disease | 2081      | Chronic leukemia of unspecified cell type                                               |
| Neoplastic disease | 2081<br>0 | Chronic leukemia of unspecified cell type without mention of having achieved remission  |
| Neoplastic disease | 2081<br>1 | Chronic leukemia of unspecified cell type in remission                                  |
| Neoplastic disease | 2081<br>2 | Chronic leukemia of unspecified cell type in relapse                                    |
| Neoplastic disease | 2082      | Subacute leukemia of unspecified cell type                                              |
| Neoplastic disease | 2082<br>0 | Subacute leukemia of unspecified cell type without mention of having achieved remission |
| Neoplastic disease | 2082<br>1 | Subacute leukemia of unspecified cell type in remission                                 |
| Neoplastic disease | 2082<br>2 | Subacute leukemia of unspecified cell type in relapse                                   |
| Neoplastic disease | 2088      | Other leukemia of unspecified cell type                                                 |
| Neoplastic disease | 2088<br>0 | Other leukemia of unspecified cell type without mention of having achieved remission    |
| Neoplastic disease | 2088<br>1 | Other leukemia of unspecified cell type in remission                                    |
| Neoplastic disease | 2088<br>2 | Other leukemia of unspecified cell type in relapse                                      |
| Neoplastic disease | 2089      | Unspecified leukemia                                                                    |
| Neoplastic disease | 2089<br>0 | Unspecified leukemia without mention of having achieved remission                       |
| Neoplastic disease | 2089<br>1 | Unspecified leukemia in remission                                                       |
| Neoplastic disease | 2089<br>2 | Unspecified leukemia in relapse                                                         |
| Neoplastic disease | 2090      | Malignant carcinoid tumors of the small intestine                                       |
| Neoplastic disease | 2090<br>0 | Malignant carcinoid tumor of the small intestine unspecified portion                    |
| Neoplastic disease | 2090<br>1 | Malignant carcinoid tumor of the duodenum                                               |
| Neoplastic disease | 2090<br>2 | Malignant carcinoid tumor of the jejunum                                                |
| Neoplastic disease | 2090<br>3 | Malignant carcinoid tumor of the ileum                                                  |
| Neoplastic disease | 2091      | Malignant carcinoid tumors of the appendix large intestine and rectum                   |
| Neoplastic disease | 2091<br>0 | Malignant carcinoid tumor of the large intestine unspecified portion                    |
| Neoplastic disease | 2091<br>1 | Malignant carcinoid tumor of the appendix                                               |



|                    |           |                                                                   |
|--------------------|-----------|-------------------------------------------------------------------|
| Neoplastic disease | 2091<br>2 | Malignant carcinoid tumor of the cecum                            |
| Neoplastic disease | 2091<br>3 | Malignant carcinoid tumor of the ascending colon                  |
| Neoplastic disease | 2091<br>4 | Malignant carcinoid tumor of the transverse colon                 |
| Neoplastic disease | 2091<br>5 | Malignant carcinoid tumor of the descending colon                 |
| Neoplastic disease | 2091<br>6 | Malignant carcinoid tumor of the sigmoid colon                    |
| Neoplastic disease | 2091<br>7 | Malignant carcinoid tumor of the rectum                           |
| Neoplastic disease | 2092      | Malignant carcinoid tumor of other and unspecified sites          |
| Neoplastic disease | 2092<br>0 | Malignant carcinoid tumor of unknown primary site                 |
| Neoplastic disease | 2092<br>1 | Malignant carcinoid tumor of the bronchus and lung                |
| Neoplastic disease | 2092<br>2 | Malignant carcinoid tumor of the thymus                           |
| Neoplastic disease | 2092<br>3 | Malignant carcinoid tumor of the stomach                          |
| Neoplastic disease | 2092<br>4 | Malignant carcinoid tumor of the kidney                           |
| Neoplastic disease | 2092<br>5 | Malignant carcinoid tumor of the foregut not otherwise specified  |
| Neoplastic disease | 2092<br>6 | Malignant carcinoid tumor of the midgut not otherwise specified   |
| Neoplastic disease | 2092<br>7 | Malignant carcinoid tumor of the hindgut not otherwise specified  |
| Neoplastic disease | 2092<br>9 | Malignant carcinoid tumor of other sites                          |
| Neoplastic disease | 2093      | Malignant poorly differentiated neuroendocrine tumors             |
| Neoplastic disease | 2093<br>0 | Malignant poorly differentiated neuroendocrine carcinoma any site |
| Neoplastic disease | 2093<br>1 | Merkel cell carcinoma of the face                                 |
| Neoplastic disease | 2093<br>2 | Merkel cell carcinoma of the scalp and neck                       |
| Neoplastic disease | 2093<br>3 | Merkel cell carcinoma of the upper limb                           |
| Neoplastic disease | 2093<br>4 | Merkel cell carcinoma of the lower limb                           |
| Neoplastic disease | 2093<br>5 | Merkel cell carcinoma of the trunk                                |
| Neoplastic disease | 2093<br>6 | Merkel cell carcinoma of other sites                              |
| Neoplastic disease | 2097      | Secondary neuroendocrine tumors                                   |
| Neoplastic disease | 2097<br>0 | Secondary neuroendocrine tumor unspecified site                   |
| Neoplastic disease | 2097<br>1 | Secondary neuroendocrine tumor of distant lymph nodes             |
| Neoplastic disease | 2097<br>2 | Secondary neuroendocrine tumor of liver                           |
| Neoplastic disease | 2097<br>3 | Secondary neuroendocrine tumor of bone                            |
| Neoplastic disease | 2097<br>4 | Secondary neuroendocrine tumor of peritoneum                      |

|                    |           |                                                                  |
|--------------------|-----------|------------------------------------------------------------------|
| Neoplastic disease | 2097<br>5 | Secondary Merkel cell carcinoma                                  |
| Neoplastic disease | 2097<br>9 | Secondary neuroendocrine tumor of other sites                    |
| Neoplastic disease | 230       | Carcinoma in situ of digestive organs                            |
| Neoplastic disease | 2300      | Carcinoma in situ of lip oral cavity and pharynx                 |
| Neoplastic disease | 2301      | Carcinoma in situ of esophagus                                   |
| Neoplastic disease | 2302      | Carcinoma in situ of stomach                                     |
| Neoplastic disease | 2303      | Carcinoma in situ of colon                                       |
| Neoplastic disease | 2304      | Carcinoma in situ of rectum                                      |
| Neoplastic disease | 2305      | Carcinoma in situ of anal canal                                  |
| Neoplastic disease | 2306      | Carcinoma in situ of anus unspecified                            |
| Neoplastic disease | 2307      | Carcinoma in situ of other and unspecified parts of intestine    |
| Neoplastic disease | 2308      | Carcinoma in situ of liver and biliary system                    |
| Neoplastic disease | 2309      | Carcinoma in situ of other and unspecified digestive organs      |
| Neoplastic disease | 231       | Carcinoma in situ of respiratory system                          |
| Neoplastic disease | 2310      | Carcinoma in situ of larynx                                      |
| Neoplastic disease | 2311      | Carcinoma in situ of trachea                                     |
| Neoplastic disease | 2312      | Carcinoma in situ of bronchus and lung                           |
| Neoplastic disease | 2318      | Carcinoma in situ of other specified parts of respiratory system |
| Neoplastic disease | 2319      | Carcinoma in situ of respiratory system part unspecified         |
| Neoplastic disease | 232       | Carcinoma in situ of skin                                        |
| Neoplastic disease | 2320      | Carcinoma in situ of skin of lip                                 |
| Neoplastic disease | 2321      | Carcinoma in situ of eyelid including canthus                    |
| Neoplastic disease | 2322      | Carcinoma in situ of skin of ear and external auditory canal     |
| Neoplastic disease | 2323      | Carcinoma in situ of skin of other and unspecified parts of face |
| Neoplastic disease | 2324      | Carcinoma in situ of scalp and skin of neck                      |
| Neoplastic disease | 2325      | Carcinoma in situ of skin of trunk except scrotum                |
| Neoplastic disease | 2326      | Carcinoma in situ of skin of upper limb including shoulder       |
| Neoplastic disease | 2327      | Carcinoma in situ of skin of lower limb including hip            |
| Neoplastic disease | 2328      | Carcinoma in situ of other specified sites of skin               |
| Neoplastic disease | 2329      | Carcinoma in situ of skin site unspecified                       |
| Neoplastic disease | 233       | Carcinoma in situ of breast and genitourinary system             |
| Neoplastic disease | 2330      | Carcinoma in situ of breast                                      |
| Neoplastic disease | 2331      | Carcinoma in situ of cervix uteri                                |
| Neoplastic disease | 2332      | Carcinoma in situ of other and unspecified parts of uterus       |
| Neoplastic disease | 2333      | Carcinoma in situ of other and unspecified female genital organs |
| Neoplastic disease | 2333<br>0 | Carcinoma in situ of unspecified female genital organ            |
| Neoplastic disease | 2333<br>1 | Carcinoma in situ of vagina                                      |
| Neoplastic disease | 2333<br>2 | Carcinoma in situ of vulva                                       |
| Neoplastic disease | 2333<br>9 | Carcinoma in situ of other female genital organ                  |
| Neoplastic disease | 2334      | Carcinoma in situ of prostate                                    |
| Neoplastic disease | 2335      | Carcinoma in situ of penis                                       |
| Neoplastic disease | 2336      | Carcinoma in situ of other and unspecified male genital organs   |
| Neoplastic disease | 2337      | Carcinoma in situ of bladder                                     |
| Neoplastic disease | 2339      | Carcinoma in situ of other and unspecified urinary organs        |
| Neoplastic disease | 234       | Carcinoma in situ of other and unspecified sites                 |
| Neoplastic disease | 2340      | Carcinoma in situ of eye                                         |
| Neoplastic disease | 2348      | Carcinoma in situ of other specified sites                       |
| Neoplastic disease | 2349      | Carcinoma in situ site unspecified                               |
| Neoplastic disease | 2384      | Polycythemia vera                                                |
| Neoplastic disease | 2386      | Neoplasm of uncertain behavior of plasma cells                   |

|                       |           |                                                                                       |
|-----------------------|-----------|---------------------------------------------------------------------------------------|
| Neoplastic disease    | 2387      | Neoplasm of uncertain behavior of other lymphatic and hematopoietic tissues           |
| Neoplastic disease    | 2387<br>1 | Essential thrombocythemia                                                             |
| Neoplastic disease    | 2387<br>2 | Low grade myelodysplastic syndrome lesions                                            |
| Neoplastic disease    | 2387<br>3 | High grade myelodysplastic syndrome lesions                                           |
| Neoplastic disease    | 2387<br>4 | Myelodysplastic syndrome with 5q deletion                                             |
| Neoplastic disease    | 2387<br>5 | Myelodysplastic syndrome unspecified                                                  |
| Neoplastic disease    | 2387<br>6 | Myelofibrosis with myeloid metaplasia                                                 |
| Neoplastic disease    | 2387<br>7 | Post-transplant lymphoproliferative disorder                                          |
| Neoplastic disease    | 2387<br>9 | Neoplasm of uncertain behavior of other lymphatic and hematopoietic tissues           |
| Neoplastic disease    | 2580<br>2 | Multiple endocrine neoplasia type IIa                                                 |
| Neoplastic disease    | 2580<br>3 | Multiple endocrine neoplasia type IIb                                                 |
| Neoplastic disease    | 2733      | Macroglobulinemia                                                                     |
| Neoplastic disease    | 2898<br>3 | Myelofibrosis                                                                         |
| Neoplastic disease    | 3573      | Polyneuropathy in malignant disease                                                   |
| Neoplastic disease    | 5118<br>1 | Malignant pleural effusion                                                            |
| Neoplastic disease    | 7895<br>1 | Malignant ascites                                                                     |
| Neoplastic disease    | 7950<br>4 | Papanicolaou smear of cervix with HGSIL                                               |
| Neoplastic disease    | 7950<br>6 | Papanicolaou smear of cervix with cytologic evidence of malignancy                    |
| Neoplastic disease    | 7951<br>4 | Papanicolaou smear of vagina with HGSIL                                               |
| Neoplastic disease    | 7951<br>6 | Papanicolaou smear of vagina with cytologic evidence of malignancy                    |
| Neoplastic disease    | 7967<br>4 | Papanicolaou smear of anus with HGSIL                                                 |
| Neoplastic disease    | 7967<br>6 | Papanicolaou smear of anus with cytologic evidence of malignancy                      |
| Neoplastic disease    | 2841<br>1 | Antineoplastic chemotherapy induced pancytopenia                                      |
| Neoplastic disease    | 5280<br>1 | Mucositis (ulcerative) due to antineoplastic therapy                                  |
| Neoplastic disease    | E930<br>7 | Antineoplastic antibiotics causing adverse effects in therapeutic use                 |
| Neoplastic disease    | E933<br>1 | Antineoplastic and immunosuppressive drugs causing adverse effects in therapeutic use |
| Neoplastic disease    | V581      | Encounter for antineoplastic chemotherapy and immunotherapy                           |
| Neoplastic disease    | V581<br>1 | Encounter for antineoplastic chemotherapy                                             |
| Neoplastic disease    | V581<br>2 | Encounter for antineoplastic immunotherapy                                            |
| Liver disease history | 0063      | Amebic liver abscess                                                                  |
| Liver disease history | 070       | Viral hepatitis                                                                       |

|                       |           |                                                                                 |
|-----------------------|-----------|---------------------------------------------------------------------------------|
| Liver disease history | 0701      | Viral hepatitis a without hepatic coma                                          |
| Liver disease history | 0703      | Viral hepatitis b without mention of hepatic coma                               |
| Liver disease history | 0703<br>0 | Viral hepatitis b without hepatic coma acute or unspecified without hepatitis D |
| Liver disease history | 0703<br>1 | Viral hepatitis B without hepatic coma acute or unspecified with hepatitis D    |
| Liver disease history | 0703<br>2 | Chronic viral hepatitis B without hepatic coma without hepatitis delta          |
| Liver disease history | 0703<br>3 | Chronic viral hepatitis B without hepatic coma with hepatitis delta             |
| Liver disease history | 0705      | Other specified viral hepatitis without mention of hepatic coma                 |
| Liver disease history | 0705<br>1 | Acute hepatitis C without mention of hepatic coma                               |
| Liver disease history | 0705<br>2 | Hepatitis D without active hepatitis B disease or hepatic coma                  |
| Liver disease history | 0705<br>3 | Hepatitis E without hepatic coma                                                |
| Liver disease history | 0705<br>4 | Chronic hepatitis C without hepatic coma                                        |
| Liver disease history | 0705<br>9 | Other specified viral hepatitis without hepatic coma                            |
| Liver disease history | 0707      | Unspecified viral hepatitis C                                                   |
| Liver disease history | 0707<br>0 | Unspecified viral hepatitis C without hepatic coma                              |
| Liver disease history | 0709      | Unspecified viral hepatitis without hepatic coma                                |
| Liver disease history | 0727<br>1 | Mumps hepatitis                                                                 |
| Liver disease history | 0916<br>2 | Secondary syphilitic hepatitis                                                  |
| Liver disease history | 0953      | Syphilis of liver                                                               |
| Liver disease history | 1220      | Echinococcus granulosus infection of liver                                      |
| Liver disease history | 1225      | Echinococcus multilocularis infection of liver                                  |
| Liver disease history | 1228      | Echinococcosis unspecified of liver                                             |
| Liver disease history | 1305      | Hepatitis due to toxoplasmosis                                                  |
| Liver disease history | 2115      | Benign neoplasm of liver and biliary passages                                   |
| Liver disease history | 2353      | Neoplasm of uncertain behavior of liver and biliary passages                    |
| Liver disease history | 571       | Chronic liver disease and cirrhosis                                             |
| Liver disease history | 5710      | Alcoholic fatty liver                                                           |
| Liver disease history | 5711      | Acute alcoholic hepatitis                                                       |
| Liver disease history | 5712      | Alcoholic cirrhosis of liver                                                    |
| Liver disease history | 5713      | Alcoholic liver damage unspecified                                              |
| Liver disease history | 5714      | Chronic hepatitis                                                               |
| Liver disease history | 5714<br>0 | Chronic hepatitis unspecified                                                   |
| Liver disease history | 5714<br>1 | Chronic persistent hepatitis                                                    |
| Liver disease history | 5714<br>2 | Autoimmune hepatitis                                                            |
| Liver disease history | 5714<br>9 | Other chronic hepatitis                                                         |
| Liver disease history | 5715      | Cirrhosis of liver without alcohol                                              |
| Liver disease history | 5716      | Biliary cirrhosis                                                               |
| Liver disease history | 5718      | Other chronic nonalcoholic liver disease                                        |
| Liver disease history | 5719      | Unspecified chronic liver disease without alcohol                               |
| Liver disease history | 572       | Liver abscess and sequelae of chronic liver disease                             |
| Liver disease history | 5720      | Abscess of liver                                                                |
| Liver disease history | 5721      | Portal pyemia                                                                   |

|                       |           |                                                                                                                                                  |
|-----------------------|-----------|--------------------------------------------------------------------------------------------------------------------------------------------------|
| Liver disease history | 5728      | Other sequelae of chronic liver disease                                                                                                          |
| Liver disease history | 573       | Other disorders of liver                                                                                                                         |
| Liver disease history | 5730      | Chronic passive congestion of liver                                                                                                              |
| Liver disease history | 5731      | Hepatitis in viral diseases classified elsewhere                                                                                                 |
| Liver disease history | 5732      | Hepatitis in other infectious diseases classified elsewhere                                                                                      |
| Liver disease history | 5733      | Hepatitis unspecified                                                                                                                            |
| Liver disease history | 5734      | Hepatic infarction                                                                                                                               |
| Liver disease history | 5738      | Other specified disorders of liver                                                                                                               |
| Liver disease history | 5739      | Unspecified disorder of liver                                                                                                                    |
| Liver disease history | 570       | Acute and subacute necrosis of liver                                                                                                             |
| Liver disease history | 4560      | Esophageal varices with bleeding                                                                                                                 |
| Liver disease history | 4561      | Esophageal varices without bleeding                                                                                                              |
| Liver disease history | 4562      | Esophageal varices in diseases classified elsewhere                                                                                              |
| Liver disease history | 5722      | Hepatic encephalopathy                                                                                                                           |
| Liver disease history | 5723      | Portal hypertension                                                                                                                              |
| Liver disease history | 5724      | Hepatorenal syndrome                                                                                                                             |
| Liver disease history | 0704<br>1 | Acute hepatitis c with hepatic coma                                                                                                              |
| Liver disease history | 0704<br>4 | Chronic hepatitis c with hepatic coma                                                                                                            |
| Liver disease history | 0707<br>1 | Unspecified viral hepatitis c with hepatic coma                                                                                                  |
| Liver disease history | 7895      | Ascites                                                                                                                                          |
| Liver disease history | 4562<br>0 | Esophageal varices in diseases classified elsewhere with bleeding                                                                                |
| Liver disease history | 4562<br>1 | Esophageal varices in diseases classified elsewhere without bleeding                                                                             |
| Liver disease history | 7895<br>9 | Other ascites                                                                                                                                    |
| Liver disease history | V427      | Liver replaced by transplant                                                                                                                     |
| CHF history           | 3989<br>1 | Rheumatic heart failure (congestive)                                                                                                             |
| CHF history           | 4020<br>1 | Malignant hypertensive heart disease with heart failure                                                                                          |
| CHF history           | 4021<br>1 | Benign hypertensive heart disease with heart failure                                                                                             |
| CHF history           | 4029<br>1 | Unspecified hypertensive heart disease with heart failure                                                                                        |
| CHF history           | 4040<br>1 | Hypertensive heart and chronic kidney disease malignant with heart failure with chronic kidney disease stage I through stage IV or unspecified   |
| CHF history           | 4040<br>3 | Hypertensive heart and chronic kidney disease malignant with heart failure with chronic kidney disease stage V or end stage renal disease        |
| CHF history           | 4041<br>1 | Hypertensive heart and chronic kidney disease benign with heart failure with chronic kidney disease stage I through stage IV or unspecified      |
| CHF history           | 4041<br>3 | Hypertensive heart and chronic kidney disease benign with heart failure with chronic kidney disease stage V or end stage renal disease           |
| CHF history           | 4049<br>1 | Hypertensive heart and chronic kidney disease unspecified with heart failure with chronic kidney disease stage I through stage IV or unspecified |
| CHF history           | 4049<br>3 | Hypertensive heart and chronic kidney disease unspecified with heart failure with chronic kidney disease stage V or end stage renal disease      |
| CHF history           | 428       | Heart failure                                                                                                                                    |
| CHF history           | 4280      | Congestive heart failure unspecified                                                                                                             |
| CHF history           | 4281      | Left heart failure                                                                                                                               |
| CHF history           | 4282      | Systolic heart failure                                                                                                                           |

|                                 |           |                                                                      |
|---------------------------------|-----------|----------------------------------------------------------------------|
| CHF history                     | 4282<br>0 | Unspecified systolic heart failure                                   |
| CHF history                     | 4282<br>1 | Acute systolic heart failure                                         |
| CHF history                     | 4282<br>2 | Chronic systolic heart failure                                       |
| CHF history                     | 4282<br>3 | Acute on chronic systolic heart failure                              |
| CHF history                     | 4283      | Diastolic heart failure                                              |
| CHF history                     | 4283<br>0 | Unspecified diastolic heart failure                                  |
| CHF history                     | 4283<br>1 | Acute diastolic heart failure                                        |
| CHF history                     | 4283<br>2 | Chronic diastolic heart failure                                      |
| CHF history                     | 4283<br>3 | Acute on chronic diastolic heart failure                             |
| CHF history                     | 4284      | Combined systolic and diastolic heart failure                        |
| CHF history                     | 4284<br>0 | Unspecified combined systolic and diastolic heart failure            |
| CHF history                     | 4284<br>1 | Acute combined systolic and diastolic heart failure                  |
| CHF history                     | 4284<br>2 | Chronic combined systolic and diastolic heart failure                |
| CHF history                     | 4284<br>3 | Acute on chronic combined systolic and diastolic heart failure       |
| CHF history                     | 4289      | Heart failure unspecified                                            |
| CHF history                     | 7855<br>1 | Cardiogenic shock                                                    |
| Cerebrovascular disease history | 430       | Subarachnoid hemorrhage                                              |
| Cerebrovascular disease history | 431       | Intracerebral hemorrhage                                             |
| Cerebrovascular disease history | 432       | Other and unspecified intracranial hemorrhage                        |
| Cerebrovascular disease history | 4320      | Nontraumatic extradural hemorrhage                                   |
| Cerebrovascular disease history | 4321      | Subdural hemorrhage                                                  |
| Cerebrovascular disease history | 4329      | Unspecified intracranial hemorrhage                                  |
| Cerebrovascular disease history | 433       | Occlusion and stenosis of precerebral arteries                       |
| Cerebrovascular disease history | 4330      | Occlusion and stenosis of basilar artery                             |
| Cerebrovascular disease history | 4330<br>0 | Occlusion and stenosis of basilar artery without cerebral infarction |
| Cerebrovascular disease history | 4330<br>1 | Occlusion and stenosis of basilar artery with cerebral infarction    |
| Cerebrovascular disease history | 4331      | Occlusion and stenosis of carotid artery                             |
| Cerebrovascular disease history | 4331<br>0 | Occlusion and stenosis of carotid artery without cerebral infarction |
| Cerebrovascular disease history | 4331<br>1 | Occlusion and stenosis of carotid artery with cerebral infarction    |
| Cerebrovascular disease history | 4332      | Occlusion and stenosis of vertebral artery                           |

|                                 |           |                                                                                                   |
|---------------------------------|-----------|---------------------------------------------------------------------------------------------------|
| Cerebrovascular disease history | 4332<br>0 | Occlusion and stenosis of vertebral artery without cerebral infarction                            |
| Cerebrovascular disease history | 4332<br>1 | Occlusion and stenosis of vertebral artery with cerebral infarction                               |
| Cerebrovascular disease history | 4333      | Occlusion and stenosis of multiple and bilateral precerebral arteries                             |
| Cerebrovascular disease history | 4333<br>0 | Occlusion and stenosis of multiple and bilateral precerebral arteries without cerebral infarction |
| Cerebrovascular disease history | 4333<br>1 | Occlusion and stenosis of multiple and bilateral precerebral arteries with cerebral infarction    |
| Cerebrovascular disease history | 4338      | Occlusion and stenosis of other specified precerebral artery                                      |
| Cerebrovascular disease history | 4338<br>0 | Occlusion and stenosis of other specified precerebral artery without cerebral infarction          |
| Cerebrovascular disease history | 4338<br>1 | Occlusion and stenosis of other specified precerebral artery with cerebral infarction             |
| Cerebrovascular disease history | 4339      | Occlusion and stenosis of unspecified precerebral artery                                          |
| Cerebrovascular disease history | 4339<br>0 | Occlusion and stenosis of unspecified precerebral artery without cerebral infarction              |
| Cerebrovascular disease history | 4339<br>1 | Occlusion and stenosis of unspecified precerebral artery with cerebral infarction                 |
| Cerebrovascular disease history | 434       | Occlusion of cerebral arteries                                                                    |
| Cerebrovascular disease history | 4340      | Cerebral thrombosis                                                                               |
| Cerebrovascular disease history | 4340<br>0 | Cerebral thrombosis without cerebral infarction                                                   |
| Cerebrovascular disease history | 4340<br>1 | Cerebral thrombosis with cerebral infarction                                                      |
| Cerebrovascular disease history | 4341      | Cerebral embolism                                                                                 |
| Cerebrovascular disease history | 4341<br>0 | Cerebral embolism without cerebral infarction                                                     |
| Cerebrovascular disease history | 4341<br>1 | Cerebral embolism with cerebral infarction                                                        |
| Cerebrovascular disease history | 4349      | Cerebral artery occlusion unspecified                                                             |
| Cerebrovascular disease history | 4349<br>0 | Cerebral artery occlusion unspecified without cerebral infarction                                 |
| Cerebrovascular disease history | 4349<br>1 | Cerebral artery occlusion unspecified with cerebral infarction                                    |
| Cerebrovascular disease history | 435       | Transient cerebral ischemia                                                                       |
| Cerebrovascular disease history | 4350      | Basilar artery syndrome                                                                           |
| Cerebrovascular disease history | 4351      | Vertebral artery syndrome                                                                         |
| Cerebrovascular disease history | 4352      | Subclavian steal syndrome                                                                         |
| Cerebrovascular disease history | 4353      | Vertebrobasilar artery syndrome                                                                   |
| Cerebrovascular disease history | 4358      | Other specified transient cerebral ischemias                                                      |
| Cerebrovascular disease history | 4359      | Unspecified transient cerebral ischemia                                                           |

|                                 |        |                                                     |
|---------------------------------|--------|-----------------------------------------------------|
| Cerebrovascular disease history | 436    | Acute but ill-defined cerebrovascular disease       |
| Cerebrovascular disease history | 437    | Other and ill-defined cerebrovascular disease       |
| Cerebrovascular disease history | 4370   | Cerebral atherosclerosis                            |
| Cerebrovascular disease history | 4371   | Other generalized ischemic cerebrovascular disease  |
| Cerebrovascular disease history | 4373   | Cerebral aneurysm nonruptured                       |
| Cerebrovascular disease history | 4374   | Cerebral arteritis                                  |
| Cerebrovascular disease history | 4375   | Moyamoya disease                                    |
| Cerebrovascular disease history | 4376   | Nonpyogenic thrombosis of intracranial venous sinus |
| Cerebrovascular disease history | 4378   | Other ill-defined cerebrovascular disease           |
| Cerebrovascular disease history | 4379   | Unspecified cerebrovascular disease                 |
| Cerebrovascular disease history | 438    | Late effects of cerebrovascular disease             |
| Cerebrovascular disease history | 4380   | Cognitive deficits                                  |
| Cerebrovascular disease history | 4381   | Speech and language deficits                        |
| Cerebrovascular disease history | 4381 0 | Speech and language deficit unspecified             |
| Cerebrovascular disease history | 4381 1 | Aphasia                                             |
| Cerebrovascular disease history | 4381 2 | Dysphasia                                           |
| Cerebrovascular disease history | 4381 3 | Dysarthria                                          |
| Cerebrovascular disease history | 4381 4 | Fluency disorder                                    |
| Cerebrovascular disease history | 4381 9 | Other speech and language deficits                  |
| Cerebrovascular disease history | 4382   | Hemiplegia/hemiparesis                              |
| Cerebrovascular disease history | 4382 0 | Hemiplegia affecting unspecified side               |
| Cerebrovascular disease history | 4382 1 | Hemiplegia affecting dominant side                  |
| Cerebrovascular disease history | 4382 2 | Hemiplegia affecting nondominant side               |
| Cerebrovascular disease history | 4383   | Monoplegia of upper limb                            |
| Cerebrovascular disease history | 4383 0 | Monoplegia of upper limb affecting unspecified side |
| Cerebrovascular disease history | 4383 1 | Monoplegia of upper limb affecting dominant side    |
| Cerebrovascular disease history | 4383 2 | Monoplegia of upper limb affecting nondominant side |
| Cerebrovascular disease history | 4384   | Monoplegia of lower limb                            |



|                                 |       |                                                                                                                                                |
|---------------------------------|-------|------------------------------------------------------------------------------------------------------------------------------------------------|
| Cerebrovascular disease history | 43840 | Monoplegia of lower limb affecting unspecified side                                                                                            |
| Cerebrovascular disease history | 43841 | Monoplegia of lower limb affecting dominant side                                                                                               |
| Cerebrovascular disease history | 43842 | Monoplegia of lower limb affecting nondominant side                                                                                            |
| Cerebrovascular disease history | 4385  | Other paralytic syndrome                                                                                                                       |
| Cerebrovascular disease history | 43850 | Other paralytic syndrome affecting unspecified side                                                                                            |
| Cerebrovascular disease history | 43851 | Other paralytic syndrome affecting dominant side                                                                                               |
| Cerebrovascular disease history | 43852 | Other paralytic syndrome affecting nondominant side                                                                                            |
| Cerebrovascular disease history | 43853 | Other paralytic syndrome bilateral                                                                                                             |
| Cerebrovascular disease history | 4386  | Alterations of sensations                                                                                                                      |
| Cerebrovascular disease history | 4387  | Disturbances of vision                                                                                                                         |
| Cerebrovascular disease history | 4388  | Other late effects of cerebrovascular disease                                                                                                  |
| Cerebrovascular disease history | 43881 | Apraxia cerebrovascular disease                                                                                                                |
| Cerebrovascular disease history | 43882 | Dysphagia cerebrovascular disease                                                                                                              |
| Cerebrovascular disease history | 43883 | Facial weakness                                                                                                                                |
| Cerebrovascular disease history | 43884 | Ataxia                                                                                                                                         |
| Cerebrovascular disease history | 43885 | Vertigo                                                                                                                                        |
| Cerebrovascular disease history | 43889 | Other late effects of cerebrovascular disease                                                                                                  |
| Cerebrovascular disease history | 4389  | Unspecified late effects of cerebrovascular disease                                                                                            |
| Renal disease history           | 2714  | Renal glycosuria                                                                                                                               |
| Renal disease history           | 28521 | Anemia in chronic kidney disease                                                                                                               |
| Renal disease history           | 40301 | Hypertensive chronic kidney disease malignant with chronic kidney disease stage V or end stage renal disease                                   |
| Renal disease history           | 40311 | Hypertensive kidney disease benign with chronic kidney disease stage V or end stage renal disease                                              |
| Renal disease history           | 40391 | Hypertensive chronic kidney disease unspecified with chronic kidney disease stage V or end stage renal disease                                 |
| Renal disease history           | 40402 | Hypertensive heart and chronic kidney disease malignant without heart failure with chronic kidney disease stage V or end stage renal disease   |
| Renal disease history           | 40403 | Hypertensive heart and chronic kidney disease malignant with heart failure with chronic kidney disease stage V or end stage renal disease      |
| Renal disease history           | 40412 | Hypertensive heart and chronic kidney disease benign without heart failure with chronic kidney disease stage V or end stage renal disease      |
| Renal disease history           | 40413 | Hypertensive heart and chronic kidney disease benign with heart failure with chronic kidney disease stage V or end stage renal disease         |
| Renal disease history           | 40492 | Hypertensive heart and chronic kidney disease unspecified without heart failure with chronic kidney disease stage V or end stage renal disease |
| Renal disease history           | 40493 | Hypertensive heart and chronic kidney disease unspecified with heart failure with chronic kidney disease stage V or end stage renal disease    |

|                       |           |                                                                                                                     |
|-----------------------|-----------|---------------------------------------------------------------------------------------------------------------------|
| Renal disease history | 4582<br>1 | Hypotension of hemodialysis                                                                                         |
| Renal disease history | 580       | Acute glomerulonephritis                                                                                            |
| Renal disease history | 5800      | Acute glomerulonephritis with lesion of proliferative glomerulonephritis                                            |
| Renal disease history | 5804      | Acute glomerulonephritis with lesion of rapidly progressive glomerulonephritis                                      |
| Renal disease history | 5808      | Acute glomerulonephritis with other specified pathological lesion in kidney                                         |
| Renal disease history | 5808<br>1 | Acute glomerulonephritis in diseases classified elsewhere                                                           |
| Renal disease history | 5808<br>9 | Acute glomerulonephritis with other specified pathological lesion in kidney                                         |
| Renal disease history | 5809      | Acute glomerulonephritis with unspecified pathological lesion in kidney                                             |
| Renal disease history | 581       | Nephrotic syndrome                                                                                                  |
| Renal disease history | 5810      | Nephrotic syndrome with lesion of proliferative glomerulonephritis                                                  |
| Renal disease history | 5811      | Nephrotic syndrome with lesion of membranous glomerulonephritis                                                     |
| Renal disease history | 5812      | Nephrotic syndrome with lesion of membranoproliferative glomerulonephritis                                          |
| Renal disease history | 5813      | Nephrotic syndrome with lesion of minimal change glomerulonephritis                                                 |
| Renal disease history | 5818      | Nephrotic syndrome with other specified pathological lesion in kidney                                               |
| Renal disease history | 5818<br>1 | Nephrotic syndrome in diseases classified elsewhere                                                                 |
| Renal disease history | 5818<br>9 | Other nephrotic syndrome with specified pathological lesion in kidney                                               |
| Renal disease history | 5819      | Nephrotic syndrome with unspecified pathological lesion in kidney                                                   |
| Renal disease history | 582       | Chronic glomerulonephritis                                                                                          |
| Renal disease history | 5820      | Chronic glomerulonephritis with lesion of proliferative glomerulonephritis                                          |
| Renal disease history | 5821      | Chronic glomerulonephritis with lesion of membranous glomerulonephritis                                             |
| Renal disease history | 5822      | Chronic glomerulonephritis with lesion of membranoproliferative glomerulonephritis                                  |
| Renal disease history | 5824      | Chronic glomerulonephritis with lesion of rapidly progressive glomerulonephritis                                    |
| Renal disease history | 5828      | Chronic glomerulonephritis with other specified pathological lesion in kidney                                       |
| Renal disease history | 5828<br>1 | Chronic glomerulonephritis in diseases classified elsewhere                                                         |
| Renal disease history | 5828<br>9 | Other chronic glomerulonephritis with specified pathological lesion in kidney                                       |
| Renal disease history | 5829      | Chronic glomerulonephritis with unspecified pathological lesion in kidney                                           |
| Renal disease history | 583       | Nephritis and nephropathy not specified as acute or chronic                                                         |
| Renal disease history | 5830      | Nephritis and nephropathy not specified as acute or chronic with lesion of proliferative glomerulonephritis         |
| Renal disease history | 5831      | Nephritis and nephropathy not specified as acute or chronic with lesion of membranous glomerulonephritis            |
| Renal disease history | 5832      | Nephritis and nephropathy not specified as acute or chronic with lesion of membranoproliferative glomerulonephritis |
| Renal disease history | 5834      | Nephritis and nephropathy not specified as acute or chronic with lesion of rapidly progressive glomerulonephritis   |
| Renal disease history | 5836      | Nephritis and nephropathy not specified as acute or chronic with lesion of renal cortical necrosis                  |
| Renal disease history | 5837      | Nephritis and nephropathy not specified as acute or chronic with lesion of renal medullary necrosis                 |
| Renal disease history | 5838      | Nephritis and nephropathy not specified as acute or chronic with other specified pathological lesion in kidney      |

|                       |           |                                                                                                                |
|-----------------------|-----------|----------------------------------------------------------------------------------------------------------------|
| Renal disease history | 5838<br>1 | Nephritis and nephropathy not specified as acute or chronic in diseases classified elsewhere                   |
| Renal disease history | 5838<br>9 | Other nephritis and nephropathy not specified as acute or chronic with specified pathological lesion in kidney |
| Renal disease history | 5839      | Nephritis and nephropathy not specified as acute or chronic with unspecified pathological lesion in kidney     |
| Renal disease history | 584       | Acute kidney failure                                                                                           |
| Renal disease history | 5845      | Acute kidney failure with lesion of tubular necrosis                                                           |
| Renal disease history | 5846      | Acute kidney failure with lesion of renal cortical necrosis                                                    |
| Renal disease history | 5847      | Acute kidney failure with lesion of renal medullary (papillary) necrosis                                       |
| Renal disease history | 5848      | Acute kidney failure with other specified pathological lesion in kidney                                        |
| Renal disease history | 5849      | Acute kidney failure unspecified                                                                               |
| Renal disease history | 585       | Chronic kidney disease                                                                                         |
| Renal disease history | 5851      | Chronic kidney disease stage I                                                                                 |
| Renal disease history | 5852      | Chronic kidney disease stage II (mild)                                                                         |
| Renal disease history | 5853      | Chronic kidney disease stage III (moderate)                                                                    |
| Renal disease history | 5854      | Chronic kidney disease stage IV (severe)                                                                       |
| Renal disease history | 5855      | Chronic kidney disease stage V                                                                                 |
| Renal disease history | 5856      | End stage renal disease                                                                                        |
| Renal disease history | 5859      | Chronic kidney disease unspecified                                                                             |
| Renal disease history | 586       | Renal failure unspecified                                                                                      |
| Renal disease history | 587       | Renal sclerosis unspecified                                                                                    |
| Renal disease history | 588       | Disorders resulting from impaired renal function                                                               |
| Renal disease history | 5880      | Renal osteodystrophy                                                                                           |
| Renal disease history | 5881      | Nephrogenic diabetes insipidus                                                                                 |
| Renal disease history | 5888      | Other specified disorders resulting from impaired renal function                                               |
| Renal disease history | 5888      | Other specified disorders resulting from impaired renal function                                               |
| Renal disease history | 5888<br>1 | Secondary hyperparathyroidism (of renal origin)                                                                |
| Renal disease history | 5888<br>9 | Other specified disorders resulting from impaired renal function                                               |
| Renal disease history | 5888<br>9 | Other specified disorders resulting from impaired renal function                                               |
| Renal disease history | 5889      | Unspecified disorder resulting from impaired renal function                                                    |
| Renal disease history | 589       | Small kidney of unknown cause                                                                                  |
| Renal disease history | 5890      | Unilateral small kidney                                                                                        |
| Renal disease history | 5891      | Bilateral small kidneys                                                                                        |
| Renal disease history | 5899      | Small kidney unspecified                                                                                       |
| Renal disease history | 590       | Infections of kidney                                                                                           |
| Renal disease history | 5900      | Chronic pyelonephritis                                                                                         |
| Renal disease history | 5900<br>0 | Chronic pyelonephritis without lesion of renal medullary necrosis                                              |
| Renal disease history | 5900<br>1 | Chronic pyelonephritis with lesion of renal medullary necrosis                                                 |
| Renal disease history | 5901      | Acute pyelonephritis                                                                                           |
| Renal disease history | 5901<br>0 | Acute pyelonephritis without lesion of renal medullary necrosis                                                |
| Renal disease history | 5901<br>1 | Acute pyelonephritis with lesion of renal medullary necrosis                                                   |
| Renal disease history | 5902      | Renal and perinephric abscess                                                                                  |
| Renal disease history | 5903      | Pyeloureteritis cystica                                                                                        |
| Renal disease history | 5908      | Other pyelonephritis or pyonephrosis not specified as acute or chronic                                         |
| Renal disease history | 5908<br>0 | Pyelonephritis unspecified                                                                                     |
| Renal disease history | 5908<br>1 | Pyelitis or pyelonephritis in diseases classified elsewhere                                                    |

|                       |           |                                                                                                                                 |
|-----------------------|-----------|---------------------------------------------------------------------------------------------------------------------------------|
| Renal disease history | 5909      | Infection of kidney unspecified                                                                                                 |
| Renal disease history | 591       | Hydronephrosis                                                                                                                  |
| Renal disease history | 5920      | Calculus of kidney                                                                                                              |
| Renal disease history | 5938<br>1 | Vascular disorders of kidney                                                                                                    |
| Renal disease history | 5939      | Unspecified disorder of kidney and ureter                                                                                       |
| Renal disease history | 7910      | Proteinuria                                                                                                                     |
| Renal disease history | 7925      | Cloudy (hemodialysis) (peritoneal) dialysis effluent                                                                            |
| Renal disease history | 7944      | Nonspecific abnormal results of function study of kidney                                                                        |
| Renal disease history | 9965<br>6 | Mechanical complication due to peritoneal dialysis catheter                                                                     |
| Renal disease history | 9966<br>8 | Infection and inflammatory reaction due to peritoneal dialysis catheter                                                         |
| Renal disease history | 9967<br>3 | Other complications due to renal dialysis device implant and graft                                                              |
| Renal disease history | 9968<br>1 | Complications of transplanted kidney                                                                                            |
| Renal disease history | E870<br>2 | Accidental cut puncture perforation or hemorrhage during kidney dialysis or other perfusion                                     |
| Renal disease history | E871<br>2 | Foreign object left in body during kidney dialysis or other perfusion                                                           |
| Renal disease history | E872<br>2 | Failure of sterile precautions during kidney dialysis and other perfusion                                                       |
| Renal disease history | E874<br>2 | Mechanical failure of instrument or apparatus during kidney dialysis and other perfusion                                        |
| Renal disease history | E879<br>1 | Kidney dialysis as the cause of abnormal reaction of patient or of later complication without misadventure at time of procedure |
| Renal disease history | V420      | Kidney replaced by transplant                                                                                                   |
| Renal disease history | V451      | Renal dialysis status                                                                                                           |
| Renal disease history | V451<br>1 | Renal dialysis status                                                                                                           |
| Renal disease history | V451<br>2 | Noncompliance with renal dialysis                                                                                               |
| Renal disease history | V56       | Encounter for dialysis and dialysis catheter care                                                                               |
| Renal disease history | V560      | Aftercare involving extracorporeal dialysis                                                                                     |
| Renal disease history | V561      | Fitting and adjustment of extracorporeal dialysis catheter                                                                      |
| Renal disease history | V562      | Fitting and adjustment of peritoneal dialysis catheter                                                                          |
| Renal disease history | V563      | Encounter for adequacy testing for dialysis                                                                                     |
| Renal disease history | V563<br>1 | Encounter for adequacy testing for hemodialysis                                                                                 |
| Renal disease history | V563<br>2 | Encounter for adequacy testing for peritoneal dialysis                                                                          |
| Renal disease history | V568      | Aftercare involving other dialysis                                                                                              |
| Altered mental status | 7809<br>7 | Altered mental status                                                                                                           |
| Respiratory rate > 29 | 7860<br>6 | Tachypnea                                                                                                                       |
| SBP < 90 mm Hg        | 458       | Hypotension                                                                                                                     |
| SBP < 90 mm Hg        | 4580      | Orthostatic hypotension                                                                                                         |
| SBP < 90 mm Hg        | 4582      | Iatrogenic hypotension                                                                                                          |
| SBP < 90 mm Hg        | 4582<br>9 | Other iatrogenic hypotension                                                                                                    |
| SBP < 90 mm Hg        | 4588      | Other specified hypotension                                                                                                     |
| SBP < 90 mm Hg        | 4589      | Hypotension unspecified                                                                                                         |
| SBP < 90 mm Hg        | 4581      | Chronic hypotension                                                                                                             |

|                                                       |           |                                                                       |
|-------------------------------------------------------|-----------|-----------------------------------------------------------------------|
| Temperature < 35°C<br>(95°F) or > 39.9°C<br>(103.8°F) | 9916      | Hypothermia                                                           |
| Temperature < 35°C<br>(95°F) or > 39.9°C<br>(103.8°F) | 7806<br>5 | Hypothermia not associated with low environmental temperature         |
| Temperature < 35°C<br>(95°F) or > 39.9°C<br>(103.8°F) | 9958<br>6 | Malignant hyperthermia                                                |
| Pulse<br>> 124 beats/minute                           | 7850      | Tachycardia unspecified                                               |
| ph < 7.35                                             | 2762      | Acidosis                                                              |
| Bun > 29 mg/dL                                        | 7944      | Nonspecific abnormal results of function study of kidney              |
| Sodium < 130 mg/dL                                    | 2761      | Hyposmolality and/or hyponatremia                                     |
| Glucose > 249 mg/dL<br>(US) or 13.9 mmol/L<br>(SI)    | 7902<br>9 | Other abnormal glucose                                                |
| Hct < 30%                                             | 7900<br>1 | Precipitous drop in Hct                                               |
| Partial pressure of<br>oxygen < 60 mm Hg              | 7990<br>2 | Hypoxemia                                                             |
| Pleural effusion on<br>X-ray                          | 5111      | Pleurisy with effusion with a bacterial cause other than tuberculosis |
| Pleural effusion on<br>X-ray                          | 5118      | Other specified forms of effusion except tuberculous                  |
| Pleural effusion on<br>X-ray                          | 5118<br>1 | Malignant pleural effusion                                            |
| Pleural effusion on<br>X-ray                          | 5118<br>9 | Other specified forms of effusion except tuberculous                  |
| Pleural effusion on<br>X-ray                          | 5119      | Unspecified pleural effusion                                          |

Abbreviations: BUN, blood urea nitrogen; CHF, congestive heart failure; Hct, hematocrit; HGSIL, high grade squamous intraepithelial lesion; ICD-9-CM, International Classification of Diseases, 9th revision, Clinical Modification; PSI, Pneumonia Severity Index; SBP, systemic blood pressure; SI, International System of Units; US, United States.

**Table S4.** 30-day mortality rates by CCI category and PSI class among patients with CABP who received ceftriaxone and macrolide on Day 1 or 2 of hospitalization.

| CCI score    | Overall |           | Risk classes I and II |           | Risk class III |           | Risk class IV |           | Risk class V |           |
|--------------|---------|-----------|-----------------------|-----------|----------------|-----------|---------------|-----------|--------------|-----------|
|              | n       | Mortality | n                     | Mortality | n              | Mortality | n             | Mortality | n            | Mortality |
| <b>0</b>     | 7,303   | 0.005     | 4,060                 | 0.002     | 2,430          | 0.008     | 796           | 0.011     | 17           | 0.118     |
| <b>1</b>     | 9,056   | 0.008     | 4,288                 | 0.003     | 3,301          | 0.007     | 1,414         | 0.023     | 53           | 0.057     |
| <b>2</b>     | 6,295   | 0.014     | 1,876                 | 0.005     | 2,462          | 0.011     | 1,854         | 0.022     | 103          | 0.087     |
| <b>3+</b>    | 10,263  | 0.026     | 1,365                 | 0.004     | 2,907          | 0.014     | 5,285         | 0.030     | 706          | 0.089     |
| <b>Total</b> | 32,917  | 0.014     | 11,589                | 0.003     | 11,100         | 0.010     | 9,349         | 0.026     | 879          | 0.087     |

CAP, community-acquired bacterial pneumonia; CCI, Charlson Comorbidity Index; PSI, Pneumonia Severity Index.

**Table S5.** 30-day CABP-related readmission rates by CCI category and PSI class among patients with CABP who received ceftriaxone and macrolide on Day 1 or 2 of hospitalization.

| CCI score    | Overall |             | Risk classes I and II |             | Risk class III |             | Risk class IV |             | Risk class V |             |
|--------------|---------|-------------|-----------------------|-------------|----------------|-------------|---------------|-------------|--------------|-------------|
|              | n       | Readmission | n                     | Readmission | n              | Readmission | n             | Readmission | n            | Readmission |
| 0            | 7,303   | 0.047       | 4,060                 | 0.038       | 2,430          | 0.058       | 796           | 0.054       | 17           | 0.235       |
| 1            | 9,056   | 0.045       | 4,288                 | 0.032       | 3,301          | 0.058       | 1,414         | 0.054       | 53           | 0.019       |
| 2            | 6,295   | 0.075       | 1,876                 | 0.063       | 2,462          | 0.080       | 1,854         | 0.077       | 103          | 0.136       |
| 3+           | 10,263  | 0.102       | 1,365                 | 0.095       | 2,907          | 0.090       | 5,285         | 0.108       | 706          | 0.116       |
| <b>Total</b> | 32,917  | 0.069       | 11,589                | 0.047       | 11,100         | 0.071       | 9,349         | 0.089       | 879          | 0.115       |

CAP, community-acquired bacterial pneumonia; CCI, Charlson Comorbidity Index; PSI, Pneumonia Severity Index.
